# Supplementary material
Source: MDPI journal article supplement (https://www.mdpi.com/2076-3417/13/3/1599)
Supplement: s1 [file s1]

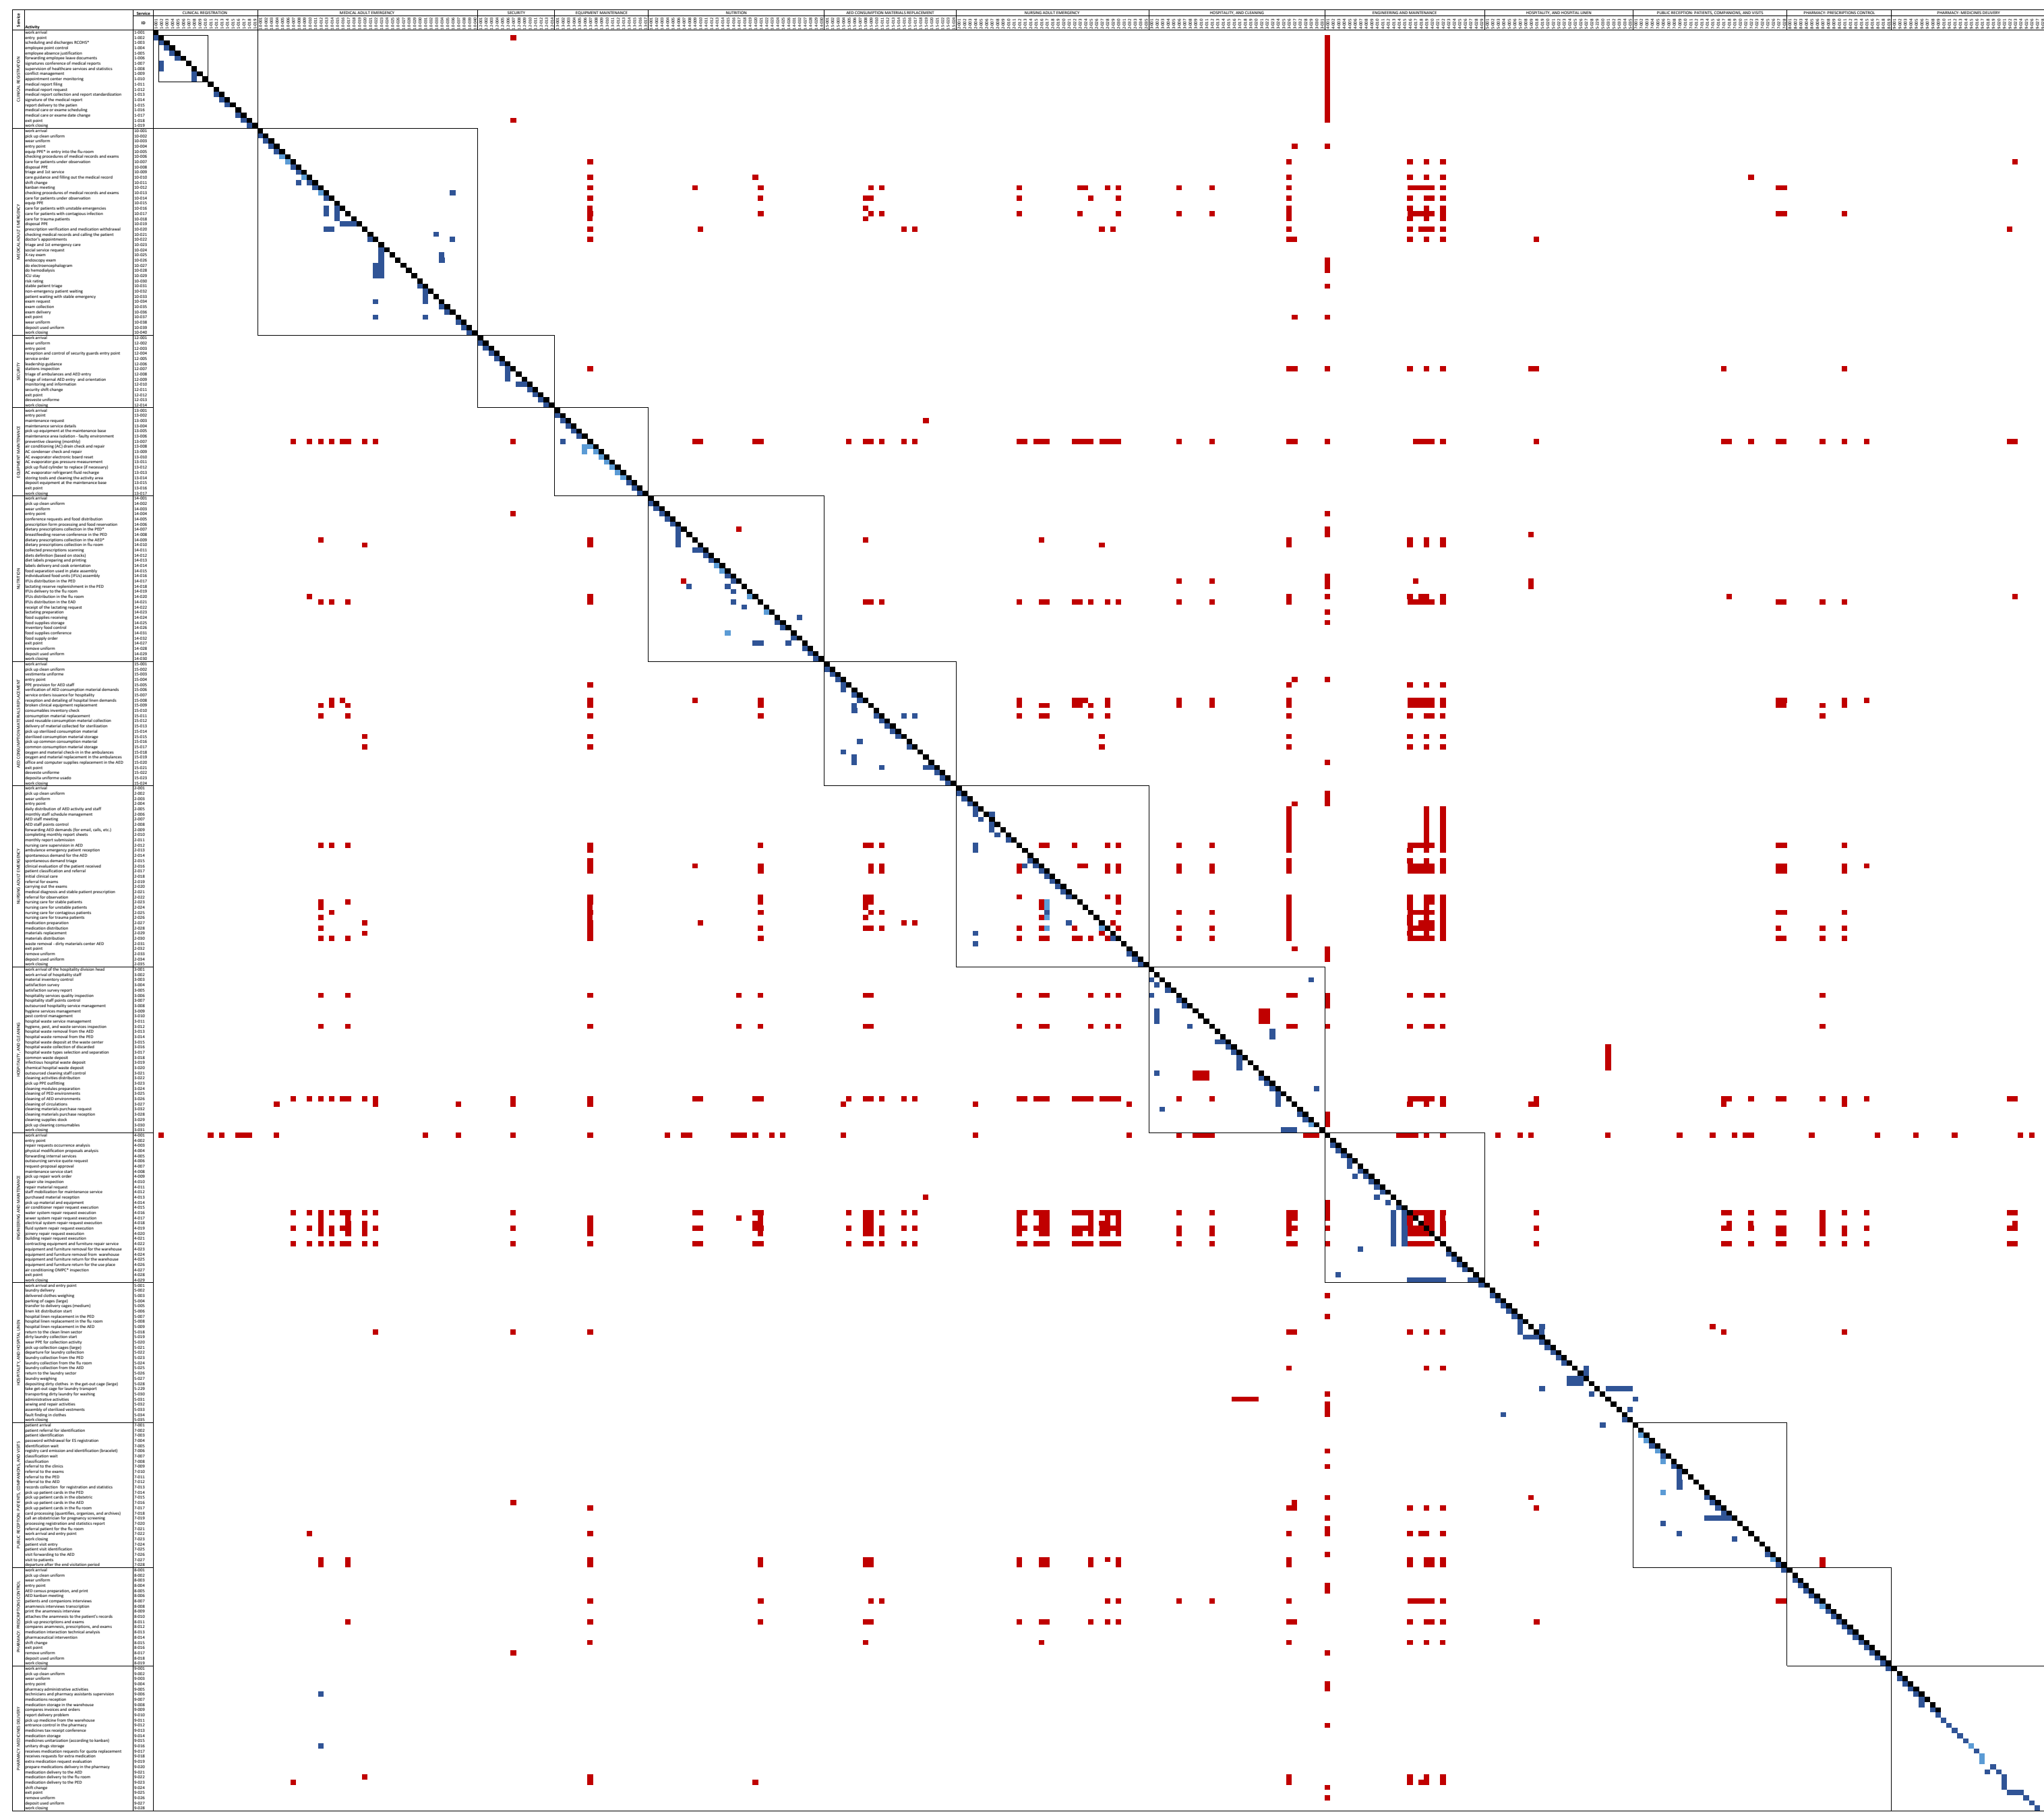

Legend: not predicted and detected; and; relationship; predicted and unconfirmed; and; relationship; predicted and confirmed; and; relationship

Abbreviations: PPE, personal protection equipment; ICU, intensive care unit; RCHS, regulation center offering health services; IFU, individual food unit; PED, pediatric emergency department; AED, adult emergency department; OMP, Operation, Maintenance, Plan, and Control.
