# Supplementary material
Source: MDPI journal article supplement (https://www.mdpi.com/2076-3417/13/3/1599)
Supplement: s1 [file s1]

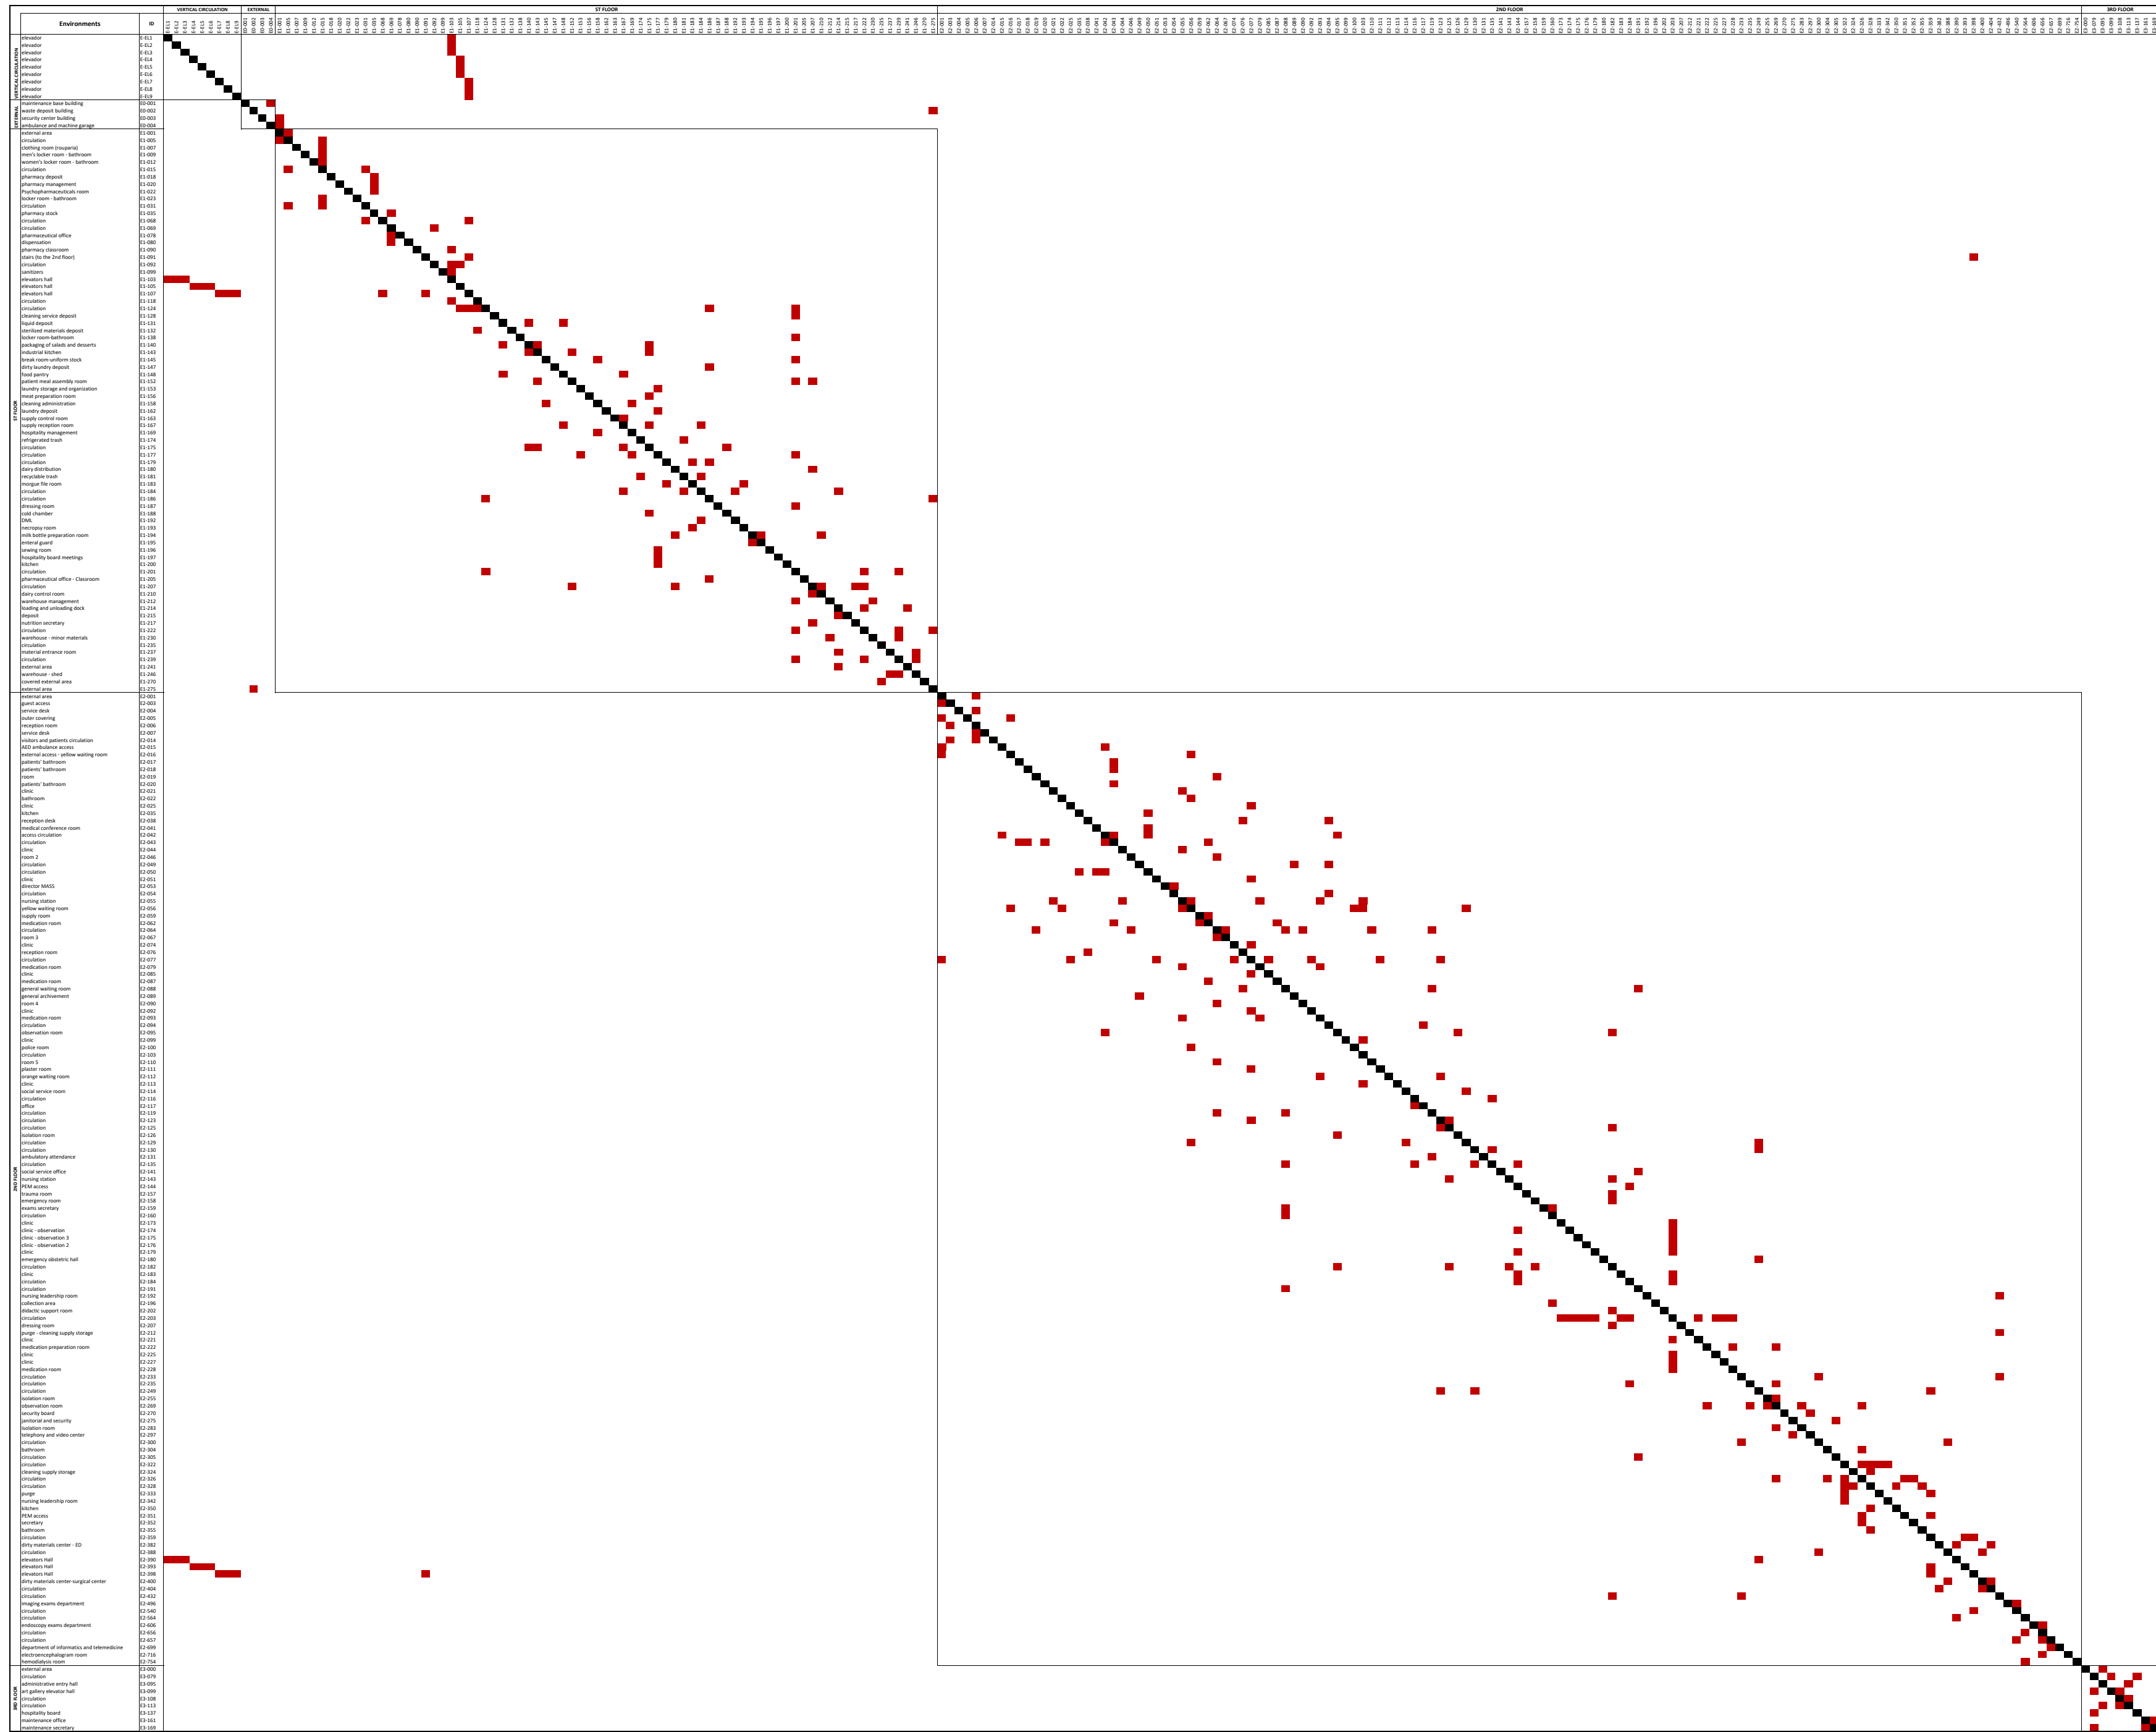

Legend:  identified *i* and *j* relationship Abbreviations: AED - adult emergency department ; PED - pediatric emergency department; MASS - medical archive and statistics service
