# Supplementary material
Source: MDPI journal article supplement (https://www.mdpi.com/2076-3417/13/3/1599)
Supplement: s1 [file s1]

Archive with 15 entries (15 files):
- S01 - interview script - example-V01.pdf
- S02-activities.txt
- S03-environments.txt
- S04-roles.txt
- S05-relationship.txt
- S06-environments_matrix.pdf
- S06-environments_matrix.xlsx
- S07-activities_matrix.pdf
- S07-activities_matrix.xlsx
- S08-relationship_matrix.pdf
- S08-relationship_matrix.xlsx
- S09-environments_congruence_matrix.pdf
- S09-environments_congruence_matrix.xlsx
- S10-activities_congruence_matrix.pdf
- S10-activities_congruence_matrix.xlsx
