# Supplementary material
Source: MDPI journal article supplement (https://www.mdpi.com/2076-3417/13/3/1599)
Supplement: s1 [file s1 › S02-activities.txt]

//PROCESS ARCHITECTURE
//[PROCESS NAME], in Caps 
//[activity number] <=> [activity description]
//	[role number involved]
//		[precedence number]
///
//	ÍNDICE DOS SERVIÇOS:
//	(E01)	CLINICAL REGISTRATION - MASS
//	(E02)	NURSING ADULT EMERGENCY 
//	(E03)	HOSPITALIDADE: LIMPEZA
//	(E04)	ENGENHARIA E MANUTENÇÃO 
//	(E05)	HOSPITALITY, AND HOSPITAL LINEN
//	(E06)	ENFERMAGEM PRONTO SOCORRO PEDIÁTRICO (suprimido)
//	(E07)	PUBLIC RECEPTION: PATIENTS, COMPANIONS, AND VISITS
//	(E08)	PHARMACY: PRESCRIPTIONS CONTROL
//	(E09)	PHARMACY: MEDICINES DELIVERY
//	(E10)	MEDICAL ADULT EMERGENCY
//	(E12)	SECURITY
//	(E13)	EQUIPMENT MAINTENANCE
//	(E14)	NUTRITION
//	(E15)	AED CONSUMPTION MATERIALS REPLACEMENT
////
CLINICAL REGISTRATION - MASS (E01)
1-001 <=> work arrival
	2004
	2005
	2006
	2007
	2008
	2009
1-002 <=> entry  point
	2004
	2005
	2006
	2007
	2008
	2009
		1-001
1-003 <=> scheduling and discharges RCOHS
	2004
		1-002
1-004 <=> employee point control
	2004
		1-003
1-005 <=> employee absence justification
	2004
		1-004
1-006 <=> forwarding employee leave documents
	2004
		1-005
1-007 <=> signatures conference of medical reports
	2004
		1-002
1-008 <=> supervision of healthcare services and statistics (MASS)
	2004
	2005
	2006
	2007
		1-002
1-009 <=> conflict management
	2004
		1-008
1-010 <=> appointment center monitoring
	2004
	2005
		1-008
1-011 <=> medical report filing
	2006
1-012 <=> medical report request
	0001
	2002
1-013 <=> medical report collection and report standardization
	2002
	2008
		1-012
1-014 <=> signature of the medical report
	2008
	2004
		1-013
1-015 <=> report delivery to the patien
	0001
	2002
		1-014
1-016 <=> medical care or exame scheduling
	0001
	2009
1-017 <=> medical care or exame date change
	0001
	2009
		1-016
1-018 <=> exit point 
	2004
	2005
	2006
	2007
	2008
	2009
		1-017
1-019 <=> work closing 
	2004
	2005
	2006
	2007
	2008
	2009
		1-018
////
NURSING ADULT EMERGENCY  (E02)
2-001 <=> work arrival
	1002
	1003
	1004
	1005
2-002 <=> pick up clean uniform
	1002
	1003
	1004
	1005
		2-001
2-003 <=> wear uniform
	1002
	1003
	1004
	1005
		2-002
2-004 <=> entry  point
	1002
	1003
	1004
	1005
		2-003
2-005 <=> daily distribution of AED activity and staff
	1002
		2-004
2-006 <=> monthly staff schedule management
	1002
		2-004
		2-007
2-007 <=> AED staff meeting
	1002
		2-005
2-008 <=> AED staff points control 
	1002
		2-007
2-009 <=> forwarding AED demands (for email, calls, etc.)
	1002
		2-007
2-010 <=> completing monthly report sheets
	1002
		2-008
2-011 <=> monthly report submission
	1002
	1001
		2-010
2-012 <=> nursing care supervision in AED
	1002
		2-004
2-013 <=> ambulance emergency patient reception 
	1004
	0001
		2-004
2-014 <=> spontaneous demand for the AED
	0001
2-015 <=> spontaneous demand triage
	1004
	0001
		2-014
2-016 <=> clinical evaluation of the patient received
	1011
	0001
		2-013
		2-015
2-017 <=> patient classification and referral
	1011
	1003
	0001
		2-016
2-018 <=> initial clinical care 
	1011
	0001
	0010
		2-017
2-019 <=> referral for exams
	1011
	0001
	0010
		2-018
2-020 <=> carrying out the exams
	0001
	0010
	1050
		2-019
2-021 <=> medical diagnosis and stable patient prescription
	1011
	0001
	0010
		2-020
2-022 <=> referral for observation
	1011
	1003
	0001
	0010
		2-021
2-023 <=> nursing care for stable patients
	1003
	1004
	1002
	0005
		2-017
2-024 <=> nursing care for unstable patients
	1003
	1004
	1002
	0006
		2-017
2-025 <=> nursing care for contagious patients
	1003
	1004
	1002
	0008
		2-017
2-026 <=> nursing care for trauma patients
	1003
	1004
	1002
	0003
		2-017
2-027 <=> medication preparation
	1004
		2-021
2-028 <=> medication distribution
	1004
	0005
	0006
	0008
		2-017
		2-027
2-029 <=> materials replacement 
	1005
		2-004
2-030 <=> materials distribution
	1005
		2-029
2-031 <=> waste removal - dirty materials center AED
	1005
		2-004
2-032 <=> exit point
	1002
	1003
	1004
	1005
2-033 <=> remove uniform
	1002
	1003
	1004
	1005
		2-032
2-034 <=> deposit used uniform
	1002
	1003
	1004
	1005
		2-033
2-035 <=> work closing 
	1002
	1003
	1004
	1005
		2-034
////
HOSPITALITY, AND CLEANING (E03)
3-001 <=> work arrival of the hospitality division head
	2021
3-002 <=> work arrival of hospitality staff
	1004
3-003 <=> material inventory control
	2021
		3-001
		3-029
3-004 <=> satisfaction survey
	1004
		3-002
3-005 <=> satisfaction survey report
	1004
	2021
		3-004
3-006 <=> hospitality services quality inspection
	2021
		3-001
3-007 <=> hospitality staff points control 
	2021
	2022
	2025
		3-006
3-008 <=> outsourced hospitality service management
	2021
	2022
	2025
		3-007
3-009 <=> hygiene services management 
	2022
		3-002
3-010 <=> pest control management 
	2022
		3-002
3-011 <=> hospital waste service management
	2022
		3-002
3-012 <=> hygiene, pest, and waste services inspection
	2022
	2023
		3-008
3-013 <=> hospital waste removal from the AED 
	2028
		3-023
3-014 <=> hospital waste removal from the PED
	2028
		3-023
3-015 <=> hospital waste deposit at the waste center
	2028
		3-013
		3-014
3-016 <=> hospital waste collection of discarded 
	2028
		3-015
3-017 <=> hospital waste types selection and separation 
	2028
		3-016
3-018 <=> common waste deposit
	2028
		3-017
3-019 <=> infectious hospital waste deposit 
	2028
		3-017
3-020 <=> chemical hospital waste deposit
	2028
		3-017
3-021 <=> outsourced cleaning staff control
	2023
	2028
		3-002
3-022 <=> cleaning activities distribution
	2023
	2028
		3-021
3-023 <=> pick up PPE outfitting
	2028
		3-022
3-024 <=> cleaning modules preparation 
	2028
		3-023
		3-030
3-025 <=> cleaning of PED environments
	2028
		3-024
3-026 <=> cleaning of AED environments
	2028
		3-024
3-027 <=> cleaning of circulations
	2028
		3-024
3-028 <=> cleaning materials purchase reception 
	2061
	2062
		3-032
3-029 <=> cleaning supplies stock
	2061
		3-028
3-030 <=> pick up cleaning consumables
	2061
		3-029
3-031 <=> work closing 
	2021
	2022
	2023
	2024
	2028
	2061
		3-025
		3-026
		3-027
3-032 <=> cleaning materials purchase request 
	2021
	2062
		3-003
3-033 <=> general cleaning
	2028
////
ENGENHARIA E MANUTENÇÃO (E04)
4-001 <=> work arrival
	2071
	2072
	2074
	2076
	2077
	2078
4-002 <=> entry  point
	2071
	2072
	2074
	2076
	2077
	2078
		4-001
4-003 <=> repair requests occurrence analysis
	2072
		4-002
4-004 <=> physical modification proposals analysis
	2072
		4-003
4-005 <=> forwarding internal services
	2072
		4-004
4-006 <=> outsourcing service quote request
	2072
		4-004
4-007 <=> request-proposal approval
	2072
		4-006
4-008 <=> maintenance service start
	2073
		4-005
		4-007
4-009 <=> pick up repair work order
	2073
	2071
		4-008
4-010 <=> repair site inspection
	2073
		4-009
4-011 <=> repair material request
	2073
	2072
	2071
		4-010
4-012 <=> staff mobilization for maintenance service
	2073
		4-009
4-013 <=> purchased material reception
	2061
		4-011
4-014 <=> pick up material and equipment
	2061
	2073
		4-013
4-015 <=> air conditioner repair request execution 
	2073
		4-012
		4-014
4-016 <=> water system repair request execution 
	2074
		4-012
		4-014
4-017 <=> sewer system repair request execution 
	2074
		4-012
		4-014
4-018 <=> electrical system repair request execution 
	2075
		4-012
		4-014
4-019 <=> fluid system repair request execution 
	2078
		4-012
		4-014
4-020 <=> joinery repair request execution 
	2076
		4-012
		4-014
4-021 <=> building repair request execution 
	2077
		4-012
		4-014
4-022 <=> contracting equipment and furniture repair service
	2072
	2079
		4-006
4-023 <=> equipment and furniture removal for the warehouse
	2078
	2077
		4-022
4-024 <=> equipment and furniture removal from  warehouse
	2079
		4-023
4-025 <=> equipment and furniture return for the warehouse
	2079
		4-024
4-026 <=> equipment and furniture return for the use place
	2078
	2077
		4-025
4-027 <=> air conditioning OMPC* inspection
	2072
		4-002
4-028 <=> exit point
	2071
	2072
	2074
	2076
	2077
	2078
		4-015
		4-016
		4-017
		4-018
		4-019
		4-020
		4-021
		4-026
		4-027
4-029 <=> work closing 
	2071
	2072
	2074
	2076
	2077
	2078
		4-028
////
HOSPITALITY, AND HOSPITAL LINEN (E5)
5-001 <=> work arrival and entry point
	2025
	2026
	2027
	2029
	2030
5-002 <=> laundry delivery
	2027
		5-001
5-003 <=> delivered clothes weighing 
	2025
		5-002
5-004 <=> parking of cages (large) 
	2025
		5-003
5-005 <=> transfer to delivery cages (medium)  
	2029
	2026
		5-004
5-006 <=> linen kit distribution start
	2029
	2026
		5-005
5-007 <=> hospital linen replacement in the PED
	2029
		5-006
5-008 <=> hospital linen replacement in the flu room
	2029
		5-006
		5-018
5-009 <=> hospital linen replacement in the AED
	2029
		5-006
		5-018
5-018 <=> return to the clean linen sector
	2029
		5-007
		5-008
		5-009
5-019 <=> dirty laundry collection start 
	2029
	2026
		5-018
5-020 <=> wear PPE for collection activity
	2029
		5-019
5-021 <=> pick up collection cages (large)
	2029
		5-020
5-022 <=> departure for laundry collection
	2029
		5-021
5-023 <=> laundry collection from the PED
	2029
		5-022
5-024 <=> laundry collection from the flu room
	2029
		5-026
5-025 <=> laundry collection from the AED
	2029
		5-026
5-026 <=> return to the laundry sector
	2029
		5-023
		5-024
		5-025
5-027 <=> laundry weighing
	2029
		5-023
		5-024
		5-025
5-028 <=> depositing dirty clothes  in the get-out cage (large)
	2029
		5-027
5-229 <=> take get-out cage for laundry transport
	2027
		5-028
5-030 <=> transporting dirty laundry for washing
	2027
		5-229
5-031 <=> administrative activities
	2026
5-032 <=> sewing and repair activities
	2029
		5-034
5-033 <=> assembly of sterilized vestments
	2030
		5-003
5-034 <=> fault finding in clothes
	2026
		5-033
5-035 <=> work closing
	2025
	2026
	2027
	2029
	2030
		5-018
		5-030
		5-031
		5-032
		5-033
		5-034
////
PUBLIC RECEPTION: PATIENTS, COMPANIONS, AND VISITS (E07)
7-001 <=> patient arrival 
	0001
	0010
7-002 <=> patient referral for identification 
	0001
	0010
	2041
		7-001
7-003 <=> patient identification 
	0001
	0010
	2001
		7-002
7-004 <=> password withdrawal for ES registration
	0001
	0010
	2041
		7-003
7-005 <=> identification wait 
	0001
	0010
		7-004
7-006 <=> registry card emission and identification (bracelet) 
	0001
	0010
	2002
		7-005
7-007 <=> classification wait 
	0001
	0010
		7-005
7-008 <=> classification
	0001
	0010
	1003
		7-007
7-009 <=> referral to the clinics 
	0001
	0010
	2002
		7-008
7-010 <=> referral for exams 
	0001
	0010
	2002
		7-008
7-011 <=> referral to the PED
	0001
	0010
	2002
		7-008
7-012 <=> referral to the AED 
	0001
	0010
	2002
		7-008
7-013 <=> records collection  for registration and statistics 
	2002
		7-005
7-014 <=> pick up patient cards in the PED
	2002
		7-013
7-015 <=> pick up patient cards in the obstetric 
	2002
		7-014
7-016 <=> pick up patient cards in the AED 
	2002
		7-015
7-017 <=> coleta de fichas do gripário 
	2002
		7-016
7-018 <=> card processing (quantifies, organizes, and archives)
	2002
		7-013
		7-014
		7-015
		7-016
		7-017
7-019 <=> call an obstetrician for pregnancy screening
	2002
	1015
		7-005
7-020 <=> processing registration and statistics report
	0001
	0010
	1015
7-021 <=> referral patient for the flu room 
	0001
	0010
	2002
		7-008
7-022 <=> work arrival and entry point 
	2001
	2002
	2041
		7-018
7-023 <=> work closing
	2001
	2002
	2041
7-024 <=> patient visit entry
	0010
	0011
	2041
7-025 <=> patient visit identification
	0010
	0011
	2001
	2002
		7-024
7-026 <=> visit forwarding to the AED
	0010
	0011
	2002
	2041
		7-025
7-027 <=> visit to patients
	0010
	0011
	0004
	0005
		7-026
7-028 <=> departure after the end visitation period
	0010
	0011
	2041
		7-027
////
PHARMACY: PRESCRIPTIONS CONTROL (E08)
8-001 <=> work arrival
	1021
8-002 <=> pick up clean uniform
	1021
	2029
		8-001
8-003 <=> wear uniform
	1021
		8-002
8-004 <=> entry point
	1021
	2041
		8-003
8-005 <=> AED census preparation, and print
	1021
		8-004
8-006 <=> AED kanban meeting
	1021
	1011
	1002
	1003
	2051
	1031
	2052
		8-005
8-007 <=> patients and companions interviews 
	1021
	0004
	0010
		8-006
8-008 <=> anamnesis interviews transcription
	1021
		8-007
8-009 <=> print the anamnesis interview 
	1021
		8-008
8-010 <=> attaches the anamnesis to the patient's records
	1021
		8-009
8-011 <=> pick up prescriptions and exams
	1021
		8-010
8-012 <=> compares anamnesis, prescriptions, and exams 
	1021
		8-011
8-013 <=> medication interaction technical analysis 
	1021
		8-012
8-014 <=> pharmaceutical intervention
	1021
	1002
	1003
		8-013
8-015 <=> shift change
	1021
		8-014
8-016 <=> exit point
	1021
		8-015
8-017 <=> remove uniform
	1021
		8-016
8-018 <=> deposit used uniform
	1021
		8-017
8-019 <=> work closing 
	1021
		8-018
////
PHARMACY: MEDICINES DELIVERY (E09)
9-001 <=> work arrival
	1021
	1022
9-002 <=> pick up clean uniform 
	1021
	1022
	2029
		9-001
9-003 <=> wear uniform
	1021
	1022
		9-002 
9-004 <=> entry point
	1021
	1022
	2041
		9-003
9-005 <=> administrative activities de farmácia 
	1021
		9-004
		10-012
9-006 <=> technicians and pharmacy assistants supervision  
	1021
	1022
		9-005
9-007 <=> medications reception
	2061
	2063
		9-005
9-008 <=> medication storage in the warehouse
	2061
		9-007
9-009 <=> compares invoices and orders
	1022
	2061
		9-008
9-010 <=> report delivery problem
	1022
	2061
	1021
		9-009
9-011 <=> pick up medicine from the warehouse
	1022
	2061
		9-010
9-012 <=> entrance control in the pharmacy 
	1022
	1021
		9-011
9-013 <=> medicines tax receipt conference
	1022
		9-012
9-014 <=> medication storage in the warehouse
	1022
		9-013
9-015 <=> medicines unitarization (according to kanban) 
	1022
		9-014
		10-012
9-016 <=> medication storage in the warehouseunitarizados 
	1022
		9-015
9-017 <=> receives medication requests for quota replacement
	1022
	1004
		9-016
9-018 <=> receives requests for extra medication 
	1021
	1022
	1004
		9-016
9-019 <=> extra medication request evaluation
	1021
	1022
	1004
		9-018
9-020 <=> prepare medications delivery in the pharmacy
	1022
		9-017
		9-019
9-021 <=> medication delivery to the AED
	1022
	1004
		9-020
9-022 <=> medication delivery to the flu room
	1022
	1004
		9-020
9-023 <=> medication delivery to the PED
	1022
	1004
		9-020
9-024 <=> shift change 
	1021
		9-021
		9-022
		9-023
9-025 <=> exit point 
	1021
	1022
	2041
		9-024
9-026 <=> remove uniform 
	1021
	1022
		9-025
9-027 <=> deposit used uniform 
	1021
	1022
		9-026
9-028 <=> work closing 
	1021
	1022
		9-027
////
MEDICAL ADULT EMERGENCY (E10)
10-001 <=> work arrival 
	1011
	1012
	1013
10-002 <=> pick up clean uniform 
	1011
	1012
	1013
		10-001
10-003 <=> wear uniform 
	1011
	1012
	1013
		10-002
10-004 <=> entry  point 
	1011
	1012
		10-003
10-005 <=> equip PPE* in entry into the flu-room
	1011
	1012
		10-004
10-006 <=> checking procedures of medical records and exams
	1011
	1012
		10-005
10-007 <=> care for patients under observation
	1011
	1012
		10-006
10-008 <=> disposal PPE 
	1011
	1012
		10-007
10-009 <=> triage and 1st service
	1011
		10-008
10-010 <=> care guidance and filling out the medical record
	1011
	1003
	1004
	1001
		10-009
10-011 <=> shift change 
	1011
	1012
	1013
		10-008
		10-010
10-012 <=> kanban meeting
	1011
	1012
	1013
	1001
	1021
	1001
		10-011
10-013 <=> checking procedures of medical records and exams
	1011
	1012
		10-012
		10-036
10-014 <=> care for patients under observation
	1011
	1012
	1013
	0005
		10-013
10-015 <=> equip PPE
	1011
	1012
		
10-016 <=> care for patients with unstable emergencies
	1011
	1012
	0006
		10-015
		10-013 
10-017 <=> care for patients with contagious infection
	1011
	1012
	0008
		10-015
		10-013 
10-018 <=> care for trauma patients
	1011
	1012
	0003
		10-015
10-019 <=> disposal PPE
	1011
	1012
		10-016
		10-017
		10-018
10-020 <=> prescription verification and medication withdrawal
	1011
	1012
		10-013
		10-014
10-021 <=> checking medical records and calling the patient
	1011
	1012
		10-033
10-022 <=> doctor's appointments
	1011
	1012
	0001
		10-021
		10-036
10-023 <=> triage and 1st serviceda emergencia
	1011
	0001
10-024 <=> social service request
	2051
	1011
	0001
	0010
		10-023
10-025 <=> X-ray exam
	1012
	0001
	0010
	1050
		10-034
		10-023
10-026 <=> endoscopy exam
	1012
	0001
	0010
	1050
		10-034
		10-023
10-027 <=> do electroencephalogram
	1012
	0001
	0010
	1050
		10-022
		10-023
10-028 <=> do hemodialysis
	1012
	0001
	0010
	1050
		10-022
		10-023
10-029 <=> ICU stay
	1012
	0001
	0010
	1060
		10-022
		10-023
10-030 <=> risk rating
	1003
	0001
10-031 <=> stable patient triage
	1003
	0001		
		10-030
10-032 <=> non-emergency patient waiting
	0007
	0010
		10-031
10-033 <=> patient waiting with stable emergency
	0005
	0010
		10-031
10-034 <=> exam request
	1012
	0001
	0010
	1004
		10-031
		10-022
10-035 <=> exam collection
	0001
	0010
		10-034 
10-036 <=> exam delivery
	0001
	0010
		10-035
10-037 <=> exit point
	1011
	1012
	1013
		10-022
		10-031
10-038 <=> remove uniform
	1011
	1012
	1013
		10-037
10-039 <=> deposit used uniform
	1011
	1012
	1013
		10-038
10-040 <=> work closing 
	1011
	1012
	1013
		10-039
////
SECURITY (E12)
12-001 <=> work arrival
	2041
	2042
	2043
12-002 <=> wear uniform
	2041
	2042
		12-001
12-003 <=> entry  point
	2041
	2042
		12-002
12-004 <=> reception and control of security guards entry point 
	2041
	2042
		12-003
12-005 <=> service order
	2041
	2042
		12-004
12-006 <=> leadership guidance
	2042
	2043
		12-005
12-007 <=> stations inspection
	2041
	2042
		12-006
12-008 <=> triage of ambulances and AED entry 
	2041
	1003
	1004
	0001
		12-006
12-009 <=> triage of internal AED entry  and orientation
	0001
	0010
	2041
		12-006
12-010 <=> monitoring and information
	2041
	2043
	0001
	0010
		12-008
		12-009
12-011 <=> shift change
	2041
	2042
	2043
		12-010
12-012 <=> exit point
	2041
	2042
		12-011
12-013 <=> remove uniform
	2041
	2042
		12-012
12-014 <=> work closing 
	2041
	2042
	2043
		12-013
////
EQUIPMENT MAINTENANCE (E13)
13-001 <=> work arrival
	2073
		
13-002 <=> entry  point
	2073
		13-001
13-003 <=> maintenance request
	2073
	2072
		13-002
13-004 <=> maintenance service details
	2073
	2072
		13-003
13-005 <=> pick up equipment at the maintenance base
	2073
		13-004
13-006 <=> maintenance area isolation - faulty environment
	2073
	2041
		13-005
13-007 <=> preventive cleaning (monthly)
	2073
		13-002
13-008 <=> air conditioning (AC) drain check and repair
	2073
		13-006
		13-007
13-009 <=> AC condenser check and repair
	2073
		13-006
		13-008
13-010 <=> AC evaporator electronic board reset
	2073
		13-009
13-011 <=> AC evaporator gas pressure measurement
	2073
		13-010
13-012 <=> pick up fluid cylinder to replace (if necessary) 
	2073
		13-011
13-013 <=> AC evaporator refrigerant fluid recharge 
	2073
		13-012
13-014 <=> storing tools and cleaning the activity area
	2073
	2028
		13-013
13-015 <=> deposit equipment at the maintenance base
	2073
		13-014
13-016 <=> exit point
	2073
		13-015
13-017 <=> work closing 
	2073
		13-016
////
NUTRITION (E14)
14-001 <=> work arrival
	1031
	1032
	1033
	1034
	1035
	1036
		
14-002 <=> pick up clean uniform
	1031
	1032
	1033
	1034
	1035
	1036
		14-001
14-003 <=> wear uniform
	1031
	1032
	1033
	1034
	1035
	1036
		14-002
14-004 <=> entry point
	1031
	1032
	1033
	1034
	1035
	1036
		14-003
14-005 <=> conference requests and food distribution
	1031
		14-004
14-006 <=> prescription form processing and food reservation
	1031
		14-005
14-007 <=> dietary prescriptions collection in the PED
	1031
	1003
		14-006
14-008 <=> breastfeeding reserve conference in the PED 
	1031
		14-006
14-009 <=> dietary prescriptions collection in the AED*
	1031
	1003
		14-006
14-010 <=> dietary prescriptions collection in flu room 
	1031
	1003
		14-006
14-011 <=> collected prescriptions scanning 
	1031
		14-009
		14-010
14-012 <=> diets definition (based on stocks)
	1031
	1035
		14-011
14-013 <=> diet labels preparing and printing
	1031
		14-012
14-014 <=> labels delivery and cook orientation
	1031
	1034
		14-013
14-015 <=> food separation used in plate assembly
	1034
	1033
		14-014
14-016 <=> individualized food units (IFUs) assembly
	1034
	1032
		14-015
14-017 <=> IFUs distribution in the PED
	1032
		14-016
14-018 <=> lactating reserve replenishment in the PED 
	1032
		14-008
		14-015
14-019 <=> IFUs delivery to the flu room
	1032
		14-016
14-020 <=> IFUs distribution in the flu room
	1032
		14-019
14-021 <=> IFUs distribution in the EAD
	1032
		14-016
14-022 <=> receipt of the lactating request
	1033
		14-018
14-023 <=> lactating preparation
	1033
		14-022
14-024 <=> food supplies receiving
	1035
	1036
		14-032
14-025 <=> food supplies storage
	1035
		14-024
14-026 <=> inventory food control
	1035
		14-025
14-027 <=> exit point
	1031
	1032
	1033
	1034
	1035
	1036
		14-020
		14-021
		14-026
14-028 <=> remove uniform
	1031
	1032
	1033
	1034
	1035
	1036
		14-027
14-029 <=> deposit used uniform
	1031
	1032
	1033
	1034
	1035
	1036
		14-028
14-030 <=> work closing 
	1031
	1032
	1033
	1034
	1035
	1036
		14-029
14-031 <=> food supplies conference
	1031
		14-015
14-032 <=> food supply order
	1031
		14-031
////
AED CONSUMPTION MATERIALS REPLACEMENT (E15)
15-001 <=> work arrival
	1005
15-002 <=> pick up clean uniform 
	1005
		15-001
15-003 <=> wear uniform 
	1005
		15-002
15-004 <=> entry point
	1005
		15-003
15-005 <=> PPE provision for AED staff
	1005
	1004
	1003
	1011
	1012
	1013
		15-004
15-006 <=> verification of AED consumption material demands
	1005
		15-004
15-007 <=> service orders issuance for hospitality
	1005
	2026
		15-006
15-008 <=> reception and detailing of hospital linen demands
	1005
	2026
	2029
		15-007
15-009 <=> broken clinical equipment replacement
	1005
	2064
	2065
		15-006
15-010 <=> consumables inventory check
	1005
		15-006
15-011 <=> consumption material replacement 
	1005
		15-010
		15-015
		15-017
15-012 <=> used reusable consumption material collection
	1005
		15-011
15-013 <=> delivery of material collected for sterilization
	1005
		15-012
15-014 <=> pick up sterilized consumption material 
	1005
		15-013
15-015 <=> sterilized consumption material storage
	1005
		15-014
15-016 <=> pick up common consumption material
	1005
		15-007
15-017 <=> common consumption material storage 
	1005
		15-016 
15-018 <=> oxygen and material check-in in the ambulances
	1005
		15-004
15-019 <=> oxygen and material replacement in the ambulances
	1005
		15-006
15-020 <=> office and computer supplies replacement in the AED
	1005
		15-006
15-021 <=> exit point
	1005
		15-011
		15-019
		15-020
15-022 <=> remove uniform
	1005
		15-021
15-023 <=> deposit used uniform
	1005
		15-022
15-024 <=> work closing 
	1005
		15-023
