# Supplementary material
Source: MDPI journal article supplement (https://www.mdpi.com/2076-3417/13/3/1599)
Supplement: s1 [file s1 › S03-environments.txt]

//ENVIRONMENT ARCHITECTURE
//[SUB-SYSTEM NAME, SET OR SECTOR]
//[component number] <=> [component name] 
//	[component number with interface]
////
VERTICAL CIRCULATION
E-EL1 <=> elevator
	E1-103
E-EL2 <=> elevator
	E1-103
E-EL3 <=> elevator
	E1-103
E-EL4 <=> elevator
	E1-105
E-EL5 <=> elevator
	E1-105
E-EL6 <=> elevator
	E1-105
E-EL7 <=> elevator
	E1-107
E-EL8 <=> elevator
	E1-107
E-EL9 <=> elevator
	E1-107
////
EXTERNAL BUILDINGS - SUPPORT FACILITIES 
E0-001 <=> maintenance base building
	E0-004
E0-002 <=> waste deposit building
	E1-275
E0-003 <=> security center building
	E1-001
E0-004 <=> ambulance and machine garage
	E1-001
////
1ST FLOOR
E1-001 <=> external area
	E1-005
E1-005 <=> circulation
	E1-001
	E1-015
E1-007 <=> clothing room (rouparia)
	E1-015
E1-009 <=> men's locker room - bathroom
	E1-015
E1-012 <=> women's locker room - bathroom
	E1-015
E1-015 <=> circulation
	E1-005
	E1-031
E1-018 <=> pharmacy deposit
	E1-035
E1-020 <=> pharmacy management
	E1-035
E1-022 <=> Psychopharmaceuticals room
	E1-035
E1-023 <=> locker room - bathroom
	E1-015
E1-031 <=> circulation
	E1-005
	E1-015
E1-035 <=> pharmacy stock
	E1-069
E1-068 <=> circulation
	E1-031
	E1-107
E1-069 <=> circulation
	E1-092
E1-078 <=> pharmaceutical office
	E1-069
E1-080 <=> dispensation
	E1-069
E1-090 <=> pharmacy classroom
	E1-103
E1-091 <=> stairs (to the 2nd floor)
	E1-107
	E2-398
E1-092 <=> circulation
	E1-105
	E1-103
E1-099 <=> sanitizers
	E1-103
E1-103 <=> elevators hall
	E-EL1
	E-EL2
	E-EL3
E1-105 <=> elevators hall
	E-EL4
	E-EL5
	E-EL6
E1-107 <=> elevators hall
	E-EL7
	E-EL8
	E-EL9
	E1-068
	E1-091
E1-118 <=> circulation
	E1-103
E1-124 <=> circulation
	E1-105
	E1-107
	E1-118
	E1-186
	E1-201
E1-128 <=> cleaning service deposit
	E1-201
E1-131 <=> liquid deposit
	E1-140
	E1-148
E1-132 <=> sterilized materials deposit
	E1-118
E1-138 <=> locker room-bathroom
	E1-201
E1-140 <=> packaging of salads and desserts
	E1-143
	E1-131
	E1-175
E1-143 <=> industrial kitchen
	E1-140
	E1-152
	E1-175
E1-145 <=> break room-uniform stock
	E1-201
	E1-158
E1-147 <=> dirty laundry deposit
	E1-186
E1-148 <=> food pantry
	E1-131
	E1-167
E1-152 <=> patient meal assembly room
	E1-201
	E1-207
	E1-143
E1-153 <=> laundry storage and organization
	E1-177
E1-156 <=> meat preparation room
	E1-175
E1-158 <=> cleaning administration
	E1-145
	E1-169
E1-162 <=> laundry deposit
	E1-177
E1-163 <=> supply control room
	E1-167
E1-167 <=> supply reception room
	E1-148
	E1-175
	E1-184
E1-169 <=> hospitality management
	E1-158
E1-174 <=> refrigerated trash
	E1-181
E1-175 <=> circulation
	E1-140
	E1-143
	E1-167
	E1-188
E1-177 <=> circulation
	E1-201
	E1-169
	E1-153
E1-179 <=> circulation
	E1-186
	E1-183
E1-180 <=> dairy distribution
	E1-207
E1-181 <=> recyclable trash
	E1-174
	E1-184
E1-183 <=> morgue file room
	E1-179
	E1-193
E1-184 <=> circulation
	E1-167
	E1-214
	E1-181
	E1-192
E1-186 <=> circulation
	E1-124
	E1-275
E1-187 <=> dressing room
	E1-201
	E1-187
E1-188 <=> cold chamber
	E1-175
E1-192 <=> DML
	E1-184
E1-193 <=> necropsy room
	E1-183
E1-194 <=> milk bottle preparation room
	E1-180
	E1-195
	E1-210
E1-195 <=> enteral guard
	E1-194
E1-196 <=> sewing room
	E1-177
E1-197 <=> hospitality board meetings
	E1-177
E1-200 <=> kitchen
	E1-177
E1-201 <=> circulation
	E1-124
	E1-239
	E1-222
E1-205 <=> pharmaceutical office - Classroom
	E1-186
E1-207 <=> circulation
	E1-152
	E1-180
	E1-210
	E1-217
	E1-222
E1-210 <=> dairy control room
	E1-207
E1-212 <=> warehouse management
	E1-201
	E1-230
E1-214 <=> loading and unloading dock
	E1-241
	E1-222
E1-215 <=> deposit
	E1-214
E1-217 <=> nutrition secretary
	E1-207
E1-222 <=> circulation
	E1-201
	E1-239
	E1-275
E1-230 <=> warehouse - minor materials
	E1-239
	E1-212
E1-235 <=> circulation
	E1-235
E1-237 <=> material entrance room
	E1-214
	E1-246
E1-239 <=> circulation
	E1-201
	E1-222
	E1-246
E1-241 <=> external area
	E1-214
E1-246 <=> warehouse - shed 1
	E1-239
	E1-237
E1-270 <=> covered external area
	E1-235
E1-275 <=> external area
	E0-002
////
2ND FLOOR
E2-001 <=> external area
	E2-006
E2-003 <=> guest access
	E2-001
	E2-214
E2-004 <=> service desk
	E2-006
E2-005 <=> outer covering
	E2-001
	E2-016
E2-007 <=> service desk
	E2-006
E2-006 <=> reception room
	E2-003
	E2-214
E2-014 <=> visitors and patients circulation
	E2-003
	E2-006
E2-015 <=> AED ambulance access
	E2-001
	E2-042
E2-016 <=> external access - yellow waiting room
	E2-001
	E2-056
E2-017 <=> patients' bathroom
	E2-043
E2-018 <=> patients' bathroom
	E2-043
E2-019 <=> room 1
	E2-064
E2-020 <=> patients' bathroom
	E2-043
E2-021 <=> clinic
	E2-055
E2-022 <=> bathroom
	E2-056
E2-025 <=> clinic
	E2-077
E2-035 <=> kitchen
	E2-050
E2-038 <=> reception desk
	E2-076
	E2-094
E2-041 <=> medical conference room
	E2-050
E2-042 <=> access circulation
	E2-015
	E2-043
	E2-050
	E2-095
E2-043 <=> circulation
	E2-042
	E2-017
	E2-018
	E2-020
	E2-062
E2-044 <=> clinic
	E2-055
E2-046 <=> room 2
	E2-064
E2-049 <=> circulation
	E2-089
	E2-094
E2-050 <=> circulation
	E2-035
	E2-041
	E2-042
E2-051 <=> clinic
	E2-077
E2-053 <=> director MASS
	E2-054
E2-054 <=> circulation
	E2-094
E2-055 <=> nursing station
	E2-021
	E2-044
	E2-079
	E2-093
	E2-103
	E2-056
E2-056 <=> yellow waiting room
	E2-016
	E2-022
	E2-055
	E2-100
	E2-103
	E2-129
E2-059 <=> supply room
	E2-062
E2-064 <=> circulation
	E2-088
	E2-019
	E2-046
	E2-067
	E2-090
	E2-110
	E2-119
E2-062 <=> medication room
	E2-043
	E2-059
	E2-087
E2-067 <=> room 3
	E2-064
E2-074 <=> clinic
	E2-077
E2-076 <=> reception room
	E2-038
E2-077 <=> circulation
	E2-001
	E2-025
	E2-051
	E2-074
	E2-085
	E2-092
	E2-111
	E2-123
E2-079 <=> medication room
	E2-055
	E2-093
E2-085 <=> clinic
	E2-077
E2-087 <=> medication room
	E2-062
E2-088 <=> general waiting room
	E2-076
	E2-119
	E2-191
E2-089 <=> general archivement
	E2-049
E2-090 <=> room 4
	E2-064
E2-092 <=> clinic
	E2-077
E2-093 <=> medication room
	E2-055
	E2-079
	E2-122
E2-094 <=> circulation
	E2-117
E2-095 <=> observation room
	E2-042
	E2-126
	E2-182
E2-099 <=> clinic
	E2-103
E2-100 <=> police room
	E2-056
E2-103 <=> circulation
E2-110 <=> room 5
	E2-064
E2-111 <=> plaster room
	E2-077
E2-112 <=> orange waiting room
	E2-093
	E2-123
E2-113 <=> clinic
	E2-103
E2-114 <=> social service room
	E2-129
E2-116 <=> circulation
	E2-135
E2-117 <=> office
	E2-116
E2-119 <=> circulation
	E2-064
	E2-088
E2-123 <=> circulation
	E2-077
	E2-125
E2-125 <=> circulation
	E2-182
	E2-123
E2-126 <=> isolation room
	E2-095
E2-129 <=> circulation
	E2-056
	E2-114
	E2-249
E2-130 <=> circulation
	E2-135
	E2-249
E2-131 <=> ambulatory attendance
	E2-119
E2-135 <=> circulation
	E2-088
	E2-116
	E2-130
	E2-144
E2-143 <=> nursing station
	E2-182
	E2-125
E2-144 <=> PEM access
	E2-184
E2-157 <=> trauma room
	E2-182
E2-158 <=> emergency room
	E2-182
E2-159 <=> exams secretary
	E2-088
	E2-160
E2-160 <=> circulation
	E2-088
E2-173 <=> clinic
	E2-203
E2-174 <=> clinic - observation 1
	E2-144
	E2-203
E2-175 <=> clinic - observation 3
	E2-203
E2-176 <=> clinic - observation 2
	E2-203
E2-179 <=> clinic
	E2-144
	E2-203
E2-180 <=> emergency obstetric hall
	E2-249
E2-182 <=> circulation
	E2-095
	E2-125
	E2-143
	E2-158
E2-183 <=> clinic
	E2-144
	E2-203
E2-184 <=> circulation
	E2-144
	E2-203
E2-191 <=> circulation
	E2-088
E2-192 <=> nursing leadership room
	E2-432
E2-196 <=> collection area
	E2-160
E2-202 <=> didactic support room
	E2-182
E2-203 <=> circulation
	E2-173
	E2-174
	E2-175
	E2-176
	E2-179
	E2-183
	E2-184
	E2-221
	E2-225
	E2-227
	E2-228
E2-207 <=> dressing room
	E2-182
E2-212 <=> purge - cleaning supply storage
	E2-432
E2-221 <=> clinic
	E2-203
E2-222 <=> medication preparation room
	E2-228
	E2-269
E2-225 <=> clinic
	E2-203
E2-227 <=> clinic
	E2-203
E2-228 <=> medication room
	E2-203
E2-233 <=> circulation
	E2-432
	E2-300
E2-235 <=> circulation
	E2-184
	E2-269
E2-141 <=> social service office
	E2-191
E2-249 <=> circulation
	E2-123
	E2-130
	E2-359
E2-255 <=> isolation room
	E2-269
E2-269 <=> observation room
	E2-222
	E2-235
	E2-255
	E2-283
	E2-326
E2-270 <=> security board
	E2-297
E2-275 <=> janitorial and security
	E2-305
E2-297 <=> telephony and video center
	E2-275
E2-283 <=> isolation room
	E2-269
E2-300 <=> circulation
	E2-233
	E2-388
E2-304 <=> bathroom
	E2-326
E2-305 <=> circulation
	E2-191
E2-322 <=> circulation
	E2-326
	E2-328
	E2-333
	E2-342
E2-324 <=> cleaning supply storage
	E2-328
E2-326 <=> circulation
	E2-269
	E2-304
	E2-322
	E2-351
	E2-352
E2-328 <=> circulation
	E2-322
	E2-324
	E2-355
	E2-350
E2-333 <=> purge
	E2-322
	E2-359
E2-342 <=> nursing leadership room
	E2-322
E2-350 <=> kitchen
	E2-328
E2-351 <=> PEM access
	E2-326
	E2-359
E2-352 <=> secretary
	E2-326
E2-355 <=> bathroom
	E2-328
E2-359 <=> circulation
	E2-393
	E2-398
E2-382 <=> dirty materials center - ED
	E2-390
	E2-404
E2-388 <=> circulation
	E2-300
	E2-400
E2-390 <=> elevators Hall
	E-EL1
	E-EL2
	E-EL3
	E2-249
E2-393 <=> elevators Hall
	E-EL4
	E-EL5
	E-EL6
	E2-359
E2-398 <=> elevators Hall
	E-EL7
	E-EL8
	E-EL9
	E1-091
	E2-359
E2-400 <=> dirty materials center-surgical center
	E2-388
	E2-404
E2-404 <=> circulation
	E2-382
	E2-400
E2-432 <=> circulation
	E2-182
	E2-233
E2-496 <=> imaging exams department
	E2-540
E2-540 <=> circulation
	E2-398
E2-564 <=> circulation
	E2-390
E2-606 <=> endoscopy exams department
	E2-656
E2-656 <=> circulation
	E2-564
E2-657 <=> circulation
	E2-540
	E2-656
E2-699 <=> department of informatics and telemedicine
	E2-657
E2-716 <=> electroencephalogram room
	E2-656
E2-754 <=> hemodialysis room
	E2-564
//// 
3RD FLOOR
E3-000 <=> external area
	E3-095
E3-079 <=>  circulation
	E3-099
	E3-137
E3-095 <=> administrative entry hall
	E3-113
E3-099 <=> "art gallery" elevator hall
	E3-079
	E3-108
	E3-115
E3-108 <=> circulation
	E3-113
E3-113 <=> circulation
	E3-095
	E3-108
E3-137 <=> hospitality board
	E3-079
E3-169 <=> maintenance secretary
	E3-079
	E3-161
E3-161 <=> maintenance office
	E3-169
