# Supplementary material
Source: MDPI journal article supplement (https://www.mdpi.com/2076-3417/13/3/1599)
Supplement: s1 [file s1 › S04-roles.txt]

//ORGANIZATIONAL ROLES
//[ROLE CLUSTER]
//[ROLE NUMBER] <=> [ROLE NAME]
////
PUBLIC
0001 <=> unclassified patient - general and undetermined use
0002 <=> referenced patient or on emergency ambulance
0003 <=> traumatized patient
0004 <=> observation patient 
0005 <=> stable emergency patient
0006 <=> unstable emergency patient
0007 <=> not emergency patient 
0008 <=> contagious infection patient (suspected and confirmed case)
0009 <=> pregnant patient
0010 <=> patient companion 
0011 <=> visitor
////
NURSING
1001 <=> director
1002 <=> head nurse 
1003 <=> nurse
1004 <=> nursing technician
1005 <=> materials manager (nursing technician)
////
MEDICINE
1011 <=> titular doctor
1012 <=> resident doctor
1013 <=> medical intern student
1014 <=> ambulatory doctor
1015 <=> obstetrician doctor
////
PHARMACY
1021 <=> pharmacist
1022 <=> pharmacy assistant and technician
////
NUTRITION AND DIET
1031 <=> nutritionist
1032 <=> diet distribution technician
1033 <=> lactarist
1034 <=> diet preparer
1035 <=> nutrition and diet unit administration
1036 <=> food item suppliers
////
MORGUE
1041 <=> autopsy officer
////
OTHER SECTORS
1050 <=> exam unit
1060 <=> intensive care unit
////
RECEPTION AND MASS (Medical Archive and Statistics Service)
2001 <=> receptionist (outsourced)
2002 <=> receptionist
2003 <=> receptionist of contagious infection patients
2004 <=> MASS supervision 
2005 <=> MASS head of emergency service archives section 
2006 <=> MASS head of statistics and reporting section
2007 <=> MASS head of internment registration section
2008 <=> medical statistics technician
2009 <=> scheduling technician
////
HOSPITALITY
2021 <=> hospitality division head
2022 <=> hygiene services superintendence
2023 <=> hygiene service technical responsible (outsourced)
2024 <=> satisfaction survey technique
2025 <=> linen services superintendence
2026 <=> clothing department manager
2027 <=> laundry services (outsourced)
2028 <=> cleaning services (outsourced)
2029 <=> linen service (outsourced)
2030 <=> sterilized laundry service (outsourced)
2031 <=> material and sterilization center responsible
////
SECURITY
2041 <=> security guard
2042 <=> security guard shift leader
2043 <=> security guard head
////
SUPPORT
2051 <=> social service agent
2052 <=> internal regulamentation core agent
2053 <=> IT and telematics technician
////
WAREHOUSE
2061 <=> warehouse worker
2062 <=> cleaning supplies suppliers
2063 <=> drug suppliers
2064 <=> clinical equipment repair services
2065 <=> clinical equipment suppliers
////
BUILDING MAINTENANCE
2071 <=> engineering and maintenance office 
2072 <=> maintenance and engineering services supervision
2073 <=> air conditioning maintenance services(outsourced)
2074 <=> water and sewer maintenance services
2075 <=> electrical maintenance services
2076 <=> carpentry maintenance services
2077 <=> general maintenance services
2078 <=> utility garage team
2079 <=> furniture repair services (outsourced)


 
