# Supplementary material
Source: MDPI journal article supplement (https://www.mdpi.com/2076-3417/13/3/1599)
Supplement: s1 [file s1 › S05-relationship.txt]

//RELATIONSHIP  
/[activity number]
//	[component number],[rating number]:
//	3=for when the end activity i occurs in the environment j
//	2=for when a means activity i occurs in the environment j
//	1=for when it circulates in the environment j to perform the activity i
////
CLINICAL REGISTRATION - MASS (E01)
1-001 <=> work arrival
	E1-001,1
1-002 <=> entry  point
	E1-068,3
1-003 <=> scheduling and discharges RCOHS
	E2-053,3
1-004 <=> employee point control
	E2-053,3
1-005 <=> employee absence justification
	E2-053,3
1-006 <=> forwarding employee leave documents
	E2-053,3
1-007 <=> signatures conference of medical reports
	E2-053,3
1-008 <=> supervision of healthcare services and statistics (MASS)
	E2-053,3
1-009 <=> conflict management
	E2-053,3
1-010 <=> appointment center monitoring
	E2-053,3
1-011 <=> medical report filing
	E2-089,3
1-012 <=> medical report request
	E2-038,3
	E2-089,2
1-013 <=> medical report collection and report standardization
	E2-089,3
1-014 <=> signature of the medical report
	E2-089,2
	E2-053,3
1-015 <=> report delivery to the patien
	E2-038,3
	E2-089,2
1-016 <=> medical care or exame scheduling
	E2-117,3
1-017 <=> medical care or exame date change
	E2-117,3
1-018 <=> exit point 
	E1-068,3
1-019 <=> work closing 
	E1-001,1
////
NURSING ADULT EMERGENCY  (E02)
2-001 <=> work arrival
	E1-001,1
2-002 <=> pick up clean uniform
	E1-007,3
2-003 <=> wear uniform
	E1-009,3
	E1-012,3
2-004 <=> entry  point
	E2-398,3
2-005 <=> daily distribution of AED activity and staff
	E2-192,3
2-006 <=> monthly staff schedule management
	E2-192,3
2-007 <=> AED staff meeting
	E2-192,3
2-008 <=> AED staff points control 
	E2-192,3
2-009 <=> forwarding AED demands (for email, calls, etc.)
	E2-192,3
2-010 <=> completing monthly report sheets
	E2-192,3
2-011 <=> monthly report submission
	E2-192,3
2-012 <=> nursing care supervision in AED
	E2-095,3
	E2-126,3
	E2-157,3
	E2-158,3
2-013 <=> ambulance emergency patient reception 
	E2-015,3
2-014 <=> spontaneous demand for the AED
	E2-015,2
2-015 <=> spontaneous demand triage
	E2-015,3
2-016 <=> clinical evaluation of the patient received
	E2-182,3
2-017 <=> patient classification and referral
	E2-182,3
2-018 <=> initial clinical care 
	E2-112,2
2-019 <=> referral for exams
	E2-112,2
2-020 <=> carrying out the exams
	E2-196,2
2-021 <=> medical diagnosis and stable patient prescription
	E2-112,2
2-022 <=> referral for observation
	E2-095,3
2-023 <=> nursing care for stable patients
	E2-095,3
2-024 <=> atendimento de enfermagem do PSA - instáveis
	E2-158,3
2-025 <=> nursing care for contagious patients
	E2-126,3
2-026 <=> nursing care for trauma patients
	E2-157,3
2-027 <=> medication preparation
	E2-062,3
	E2-087,3
2-028 <=> medication distribution
	E2-062,2
	E2-095,3
	E2-126,3
	E2-157,3
	E2-158,3
2-029 <=> materials replacement 
	E2-059,3
2-030 <=> materials distribution
	E2-059,2
	E2-095,3
	E2-126,3
	E2-157,3
	E2-158,3
//ver03// 2-031 <=> remoção de resíduos - central de materiais sujos PSA
//ver03// 	E2-212,2
//ver03// 	E2-382,3
2-032 <=> exit point
	E2-398,3
2-033 <=> remove uniform
	E1-009,3
	E1-012,3
2-034 <=> deposit used uniform
	E1-007,3
2-035 <=> work closing 
	E1-001,1
////
HOSPITALITY, AND CLEANING (E03)
3-001 <=> work arrival of the hospitality division head
	E3-000,1
3-002 <=> work arrival of hospitality staff
	E1-001,2
3-003 <=> material inventory control
	E3-137,2
3-004 <=> satisfaction survey
	E3-137,3
3-005 <=> satisfaction survey report
	E3-137,3
3-006 <=> hospitality services quality inspection
	E2-333,3
	E2-269,3
	E2-095,3
	E2-212,3
	E2-382,3
	E1-147,3
	E1-197,2
3-007 <=> hospitality staff points control 
	E3-137,2
	E1-197,3
3-008 <=> outsourced hospitality service management
	E3-137,2
	E1-197,3
3-009 <=> hygiene services management 
	E1-169,3
	E2-333,2
	E2-269,2
	E2-095,2
	E2-212,2
	E2-382,2
	E1-147,2
3-010 <=> pest control management 
	E1-169,3
	E2-333,2
	E2-269,2
	E2-095,2
	E2-212,2
	E2-382,2
	E1-147,2
3-011 <=> hospital waste service management
	E1-169,3
	E2-333,2
	E2-269,2
	E2-095,2
	E2-212,2
	E2-382,2
	E1-147,2
3-012 <=> hygiene, pest, and waste services inspection
	E2-333,3
	E2-269,3
	E2-095,3
	E2-212,3
	E2-382,3
	E1-147,3
3-013 <=> hospital waste removal from the AED 
	E2-212,2
3-014 <=> hospital waste removal from the PED
	E2-333,2
3-015 <=> hospital waste deposit at the waste center
	E2-212,2
	E2-333,2
	E2-382,3
3-016 <=> hospital waste collection of discarded 
	E2-382,2
	E-EL5,1
	E0-002,3
3-017 <=> hospital waste types selection and separation 
	E0-002,3
3-018 <=> common waste deposit
	E0-002,3
3-019 <=> infectious hospital waste deposit 
	E0-002,3
3-020 <=> chemical hospital waste deposit
	E0-002,3
3-021 <=> outsourced cleaning staff control
	E1-158,3
3-022 <=> cleaning activities distribution
	E1-158,3
3-023 <=> pick up PPE outfitting
	E1-138,3
3-024 <=> cleaning modules preparation 
	E1-128,3
	E1-201,2
//3-025 <=> cleaning of PED environments
//	
3-026 <=> cleaning of AED environments
	E2-017,3
	E2-018,3
	E2-020,3
	E2-021,3
	E2-022,3
	E2-025,3
	E2-035,3
	E2-041,3
	E2-042,3
	E2-043,3
	E2-044,3
	E2-050,3
	E2-051,3
	E2-055,3
	E2-056,3
	E2-059,3
	E2-062,3
	E2-074,3
	E2-077,3
	E2-079,3
	E2-085,3
	E2-087,3
	E2-092,3
	E2-093,3
	E2-095,3
	E2-099,3
	E2-100,3
	E2-103,3
	E2-111,3
	E2-112,3
	E2-113,3
	E2-114,3
	E2-123,3
	E2-125,3
	E2-126,3
	E2-129,3
	E2-143,3
	E2-157,3
	E2-158,3
	E2-182,3
	E2-192,3
	E2-202,3
	E2-207,3
	E2-212,3
	E2-432,3
3-027 <=> cleaning of circulations
	E2-077,3
	E2-123,3
	E2-130,3
	E2-135,3
	E2-191,3
	E2-233,3
	E2-249,3
	E2-300,3
	E2-305,3
	E2-359,3
	E2-388,3
	E2-390,3
	E2-393,3
	E2-398,3
3-028 <=> cleaning materials purchase reception 
	E1-192,3
	E1-241,2
3-029 <=> cleaning supplies stock
	E1-237,2
	E1-246,3
3-030 <=> pick up cleaning consumables
	E1-246,3
3-031 <=> work closing 
	E1-001,2
3-032 <=> cleaning materials purchase request 
	E3-137,3
3-033 <=> general cleaning
	E-EL1,3
	E-EL3,3
	E-EL7,3
	E-EL8,3
	E-EL9,3
	E1-005,3
	E1-015,3
	E1-022,3
	E1-023,3
	E1-090,3
	E1-091,3
	E1-103,3
	E1-105,3
	E1-107,3
	E1-118,3
	E1-124,3
	E1-140,3
	E1-145,3
	E1-156,3
	E1-162,3
	E1-167,3
	E1-174,3
	E1-175,3
	E1-177,3
	E1-179,3
	E1-181,3
	E1-183,3
	E1-184,3
	E1-186,3
	E1-187,3
	E1-193,3
	E1-195,3
	E1-200,3
	E1-212,3
	E1-215,3
	E1-222,3
	E1-230,3
	E1-235,3
	E1-239,3
	E2-004,3
	E2-014,3
	E2-016,3
	E2-049,3
	E2-054,3
	E2-064,3
	E2-094,3
	E2-116,3
	E2-119,3
	E2-160,3
	E2-179,3
	E2-203,3
	E2-221,3
	E2-222,3
	E2-225,3
	E2-227,3
	E2-235,3
	E2-275,3
	E2-297,3
	E2-304,3
	E2-322,3
	E2-324,3
	E2-326,3
	E2-328,3
	E2-342,3
	E2-350,3
	E2-351,3
	E2-352,3
	E2-355,3
	E2-400,3
	E2-404,3
	E2-564,3
	E2-656,3
	E2-657,3
	E3-099,3
	E3-108,3
	E3-113,3

////
ENGENHARIA E MANUTENÇÃO (E04)
4-001 <=> work arrival
	E3-000,1
4-002 <=> entry  point
	E3-079,2
4-003 <=> repair requests occurrence analysis
	E3-161,3
4-004 <=> physical modification proposals analysis
	E3-161,3
4-005 <=> forwarding internal services
	E3-161,3
4-006 <=> outsourcing service quote request
	E3-161,3
4-007 <=> request-proposal approval
	E3-161,3
4-008 <=> maintenance service start
	E0-001,2
	E1-001,1
	E-EL5,1
4-009 <=> pick up repair work order
	E3-169,2
4-010 <=> repair site inspection
	E2-017,2
	E2-018,2
	E2-020,2
	E2-021,2
	E2-022,2
	E2-025,2
	E2-035,2
	E2-041,2
	E2-042,2
	E2-043,2
	E2-044,2
	E2-050,2
	E2-051,2
	E2-055,2
	E2-056,2
	E2-059,2
	E2-062,2
	E2-074,2
	E2-077,2
	E2-079,2
	E2-085,2
	E2-087,2
	E2-092,2
	E2-093,2
	E2-095,2
	E2-099,2
	E2-100,2
	E2-103,2
	E2-111,2
	E2-112,2
	E2-113,2
	E2-114,2
	E2-123,2
	E2-125,2
	E2-126,2
	E2-129,2
	E2-143,2
	E2-157,2
	E2-158,2
	E2-182,2
	E2-192,2
	E2-202,2
	E2-207,2
	E2-212,2
	E2-432,2
//	ver possibilidade de randomizar 1
4-011 <=> repair material request
	E3-161,3
4-012 <=> staff mobilization for maintenance service
	E0-001,3
4-013 <=> purchased material reception
	E1-214,3
	E1-246,2
4-014 <=> pick up material and equipment
	E1-246,3
4-015 <=> air conditioner repair request execution 
	E2-021,3
	E2-025,3
	E2-041,3
	E2-042,3
	E2-044,3
	E2-051,3
	E2-055,3
	E2-056,3
	E2-059,3
	E2-062,3
	E2-074,3
	E2-077,3
	E2-079,3
	E2-085,3
	E2-087,3
	E2-092,3
	E2-093,3
	E2-095,3
	E2-099,3
	E2-103,3
	E2-111,3
	E2-112,3
	E2-113,3
	E2-123,3
	E2-126,3
	E2-129,3
	E2-143,3
	E2-157,3
	E2-158,3
	E2-182,3
	E2-192,3
	E2-202,3
	E2-207,3
	E2-212,3
//ver possibilidade de randomizar 1
4-016 <=> water system repair request execution 
	E2-333,3
	E2-269,3
	E2-095,3
	E2-212,3
	E2-382,3
	E1-147,3
4-017 <=> sewer system repair request execution 
	E2-017,3
	E2-018,3
	E2-020,3
	E2-022,3
	E2-035,3
	E2-044,3
	E2-079,3
	E2-087,3
	E2-095,3
	E2-113,3
	E2-212,3
4-018 <=> electrical system repair request execution 
	E2-017,3
	E2-018,3
	E2-020,3
	E2-021,3
	E2-022,3
	E2-025,3
	E2-035,3
	E2-041,3
	E2-042,3
	E2-043,3
	E2-044,3
	E2-050,3
	E2-051,3
	E2-055,3
	E2-056,3
	E2-059,3
	E2-062,3
	E2-074,3
	E2-077,3
	E2-079,3
	E2-085,3
	E2-087,3
	E2-092,3
	E2-093,3
	E2-095,3
	E2-099,3
	E2-100,3
	E2-103,3
	E2-111,3
	E2-112,3
	E2-113,3
	E2-114,3
	E2-123,3
	E2-125,3
	E2-126,3
	E2-129,3
	E2-143,3
	E2-157,3
	E2-158,3
	E2-182,3
	E2-192,3
	E2-202,3
	E2-207,3
	E2-212,3
	E2-432,3
4-019 <=> fluid system repair request execution 
	E2-059,3
	E2-095,3
	E2-126,3
	E2-157,3
	E2-158,3
4-020 <=> joinery repair request execution 
	E1-246,2
	E0-001,2
4-021 <=> building repair request execution 
	E2-017,3
	E2-018,3
	E2-020,3
	E2-021,3
	E2-022,3
	E2-025,3
	E2-035,3
	E2-041,3
	E2-042,3
	E2-043,3
	E2-044,3
	E2-050,3
	E2-051,3
	E2-055,3
	E2-056,3
	E2-059,3
	E2-062,3
	E2-074,3
	E2-077,3
	E2-079,3
	E2-085,3
	E2-087,3
	E2-092,3
	E2-093,3
	E2-095,3
	E2-099,3
	E2-100,3
	E2-103,3
	E2-111,3
	E2-112,3
	E2-113,3
	E2-114,3
	E2-123,3
	E2-125,3
	E2-126,3
	E2-129,3
	E2-143,3
	E2-157,3
	E2-158,3
	E2-182,3
	E2-192,3
	E2-202,3
	E2-207,3
	E2-212,3
	E2-432,3
4-022 <=> contracting equipment and furniture repair service
	E3-161,2
4-023 <=> equipment and furniture removal for the warehouse
	E1-246,2
	E0-001,2
4-024 <=> equipment and furniture removal from  warehouse
	E1-246,2
	E0-001,2
4-025 <=> equipment and furniture return for the warehouse
	E1-246,2
	E0-001,2
4-026 <=> equipment and furniture return for the use place
	E1-246,2
	E0-001,2
4-027 <=> air conditioning OMPC* inspection
	E2-021,2
	E2-025,2
	E2-041,2
	E2-042,2
	E2-044,2
	E2-051,2
	E2-055,2
	E2-056,2
	E2-059,2
	E2-062,2
	E2-074,2
	E2-077,2
	E2-079,2
	E2-085,2
	E2-087,2
	E2-092,2
	E2-093,2
	E2-095,2
	E2-099,2
	E2-103,2
	E2-111,2
	E2-112,2
	E2-113,2
	E2-123,2
	E2-126,2
	E2-129,2
	E2-143,2
	E2-157,2
	E2-158,2
	E2-182,2
	E2-192,2
	E2-202,2
	E2-207,2
	E2-212,2
4-028 <=> exit point
	E3-079,2
4-029 <=> work closing 
	E3-000,1
////
HOSPITALITY, AND HOSPITAL LINEN (E5)
5-001 <=> work arrival and entry point
	E1-001,1
5-002 <=> laundry delivery
	E1-214,3
	E1-241,2
5-003 <=> delivered clothes weighing 
	E1-169,2
5-004 <=> parking of cages (large) 
	E1-153,2
5-005 <=> transfer to delivery cages (medium)  
	E1-153,2
5-006 <=> linen kit distribution start
	E1-153,3
	E-EL6,1
//5-007 <=> hospital linen replacement in the PED
//	E2-269,3
5-008 <=> hospital linen replacement in the flu room
	E2-144,3
5-009 <=> hospital linen replacement in the AED
	E2-077,3
5-018 <=> return to the clean linen sector
	E1-153,2
	E-EL6,1
5-019 <=> dirty laundry collection start 
	E1-153,2
5-020 <=> wear PPE for collection activity
	E1-138,2
5-021 <=> pick up collection cages (large)
	E1-147,2
5-022 <=> departure for laundry collection
	E1-147,2
//5-023 <=> laundry collection from the PED
//	E2-333,3
5-024 <=> laundry collection from the flu room
	E2-212,3
	E2-388,1
//5-025 <=> laundry collection from the AED
//	E2-403,3
5-026 <=> return to the laundry sector
	E1-147,2
5-027 <=> laundry weighing
	E1-147,2
5-028 <=> depositing dirty clothes  in the get-out cage (large)
	E1-147,3
5-229 <=> take get-out cage for laundry transport
	E1-147,2
5-030 <=> transporting dirty laundry for washing
	E1-275,3
5-031 <=> administrative activities
	E1-197,3
5-032 <=> sewing and repair activities
	E1-196,3
5-033 <=> assembly of sterilized vestments
	E1-196,3
5-034 <=> fault finding in clothes
	E1-153,2
5-035 <=> work closing
	E1-001,1
////
PUBLIC RECEPTION: PATIENTS, COMPANIONS, AND VISITS (E07)
7-001 <=> patient arrival 
	E2-001,1
7-002 <=> patient referral for identification 
	E2-003,2
7-003 <=> patient identification 
	E2-006,2
	E2-007,3
7-004 <=> password withdrawal for ES registration
	E2-076,2
7-005 <=> identification wait 
	E2-076,2
7-005 <=> registry card emission and identification (bracelet) 
	E2-076,3
	E2-038,3
7-007 <=> classification wait 
	E2-076,2
7-008 <=> classification
	E2-019,3
	E2-046,3
	E2-067,3
	E2-090,3
	E2-110,3
7-009 <=> referral to the clinics 
	E2-131,2
7-010 <=> referral for exams 
	E2-540,1
7-011 <=> referral to the PED
	E2-135,1
	E2-184,2
7-012 <=> referral to the AED 
	E2-123,2
	E2-112,2
7-013 <=> records collection  for registration and statistics 
	E2-038,2
7-014 <=> pick up patient cards in the PED
	E2-184,3
7-015 <=> pick up patient cards in the obstetric 
	E2-180,3
7-016 <=> pick up patient cards in the AED 
	E2-123,3
7-017 <=> coleta de fichas do gripário 
	E2-103,3
7-018 <=> card processing (quantifies, organizes, and archives)
	E2-117,3
7-019 <=> call an obstetrician for pregnancy screening
	E2-180,2
7-020 <=> processing registration and statistics report
	E2-117,3
7-021 <=> referral patient for the flu room 
	E2-005,2
	E2-076,2
	E2-103,1
	E2-056,3
7-022 <=> work arrival and entry point 
	E3-000,1
7-023 <=> work closing
	E3-000,1
7-024 <=> patient visit entry
	E2-003,2
7-025 <=> patient visit identification
	E2-038,3
	E2-076,2
7-026 <=> visit forwarding to the AED
	E2-038,2
	E2-125,1
	E2-095,3
7-027 <=> visit to patients
	E2-095,3
7-028 <=> departure after the end visitation period
	E2-095,2
	E2-003,2
////
PHARMACY: PRESCRIPTIONS CONTROL (E08)
8-001 <=> work arrival
	E1-001,1
8-002 <=> pick up clean uniform
	E1-007,2
8-003 <=> wear uniform
	E1-009,3
	E1-012,3
8-004 <=> entry point
	E1-068,3
8-005 <=> AED census preparation, and print
	E1-078,3
8-006 <=> reunião do kanban PS adulto 
	E2-182,3
8-007 <=> patients and companions interviews 
	E2-095,2
8-008 <=> anamnesis interviews transcription
	E1-205,2
8-009 <=> print the anamnesis interview 
	E1-080,2
8-010 <=> attaches the anamnesis to the patient's records
	E2-095,3
	E2-123,3
8-011 <=> pick up prescriptions and exams
	E2-062,2
8-012 <=> compares anamnesis, prescriptions, and exams 
	E1-205,2
8-013 <=> medication interaction technical analysis 
	E1-205,2
8-014 <=> pharmaceutical intervention
	E2-143,3
8-015 <=> shift change
	E1-205,2
8-016 <=> exit point
	E1-068,3
8-017 <=> remove uniform
	E1-009,2
	E1-012,2
8-018 <=> deposit used uniform
	E1-007,2
8-019 <=> work closing 
	E1-001,1
////
PHARMACY: MEDICINES DELIVERY (E09)
9-001 <=> work arrival
	E1-001,1
9-002 <=> pick up clean uniform limpo 
	E1-007,2
9-003 <=> wear uniform
	E1-009,3
	E1-012,3
9-004 <=> entry point
	E1-068,3
9-005 <=> administrative activities de farmácia 
	E1-020,3
9-006 <=> technicians and pharmacy assistants supervision  
	E1-020,3
9-007 <=> medications reception
	E1-214,2
9-008 <=> medication storage in the warehouse
	E1-246,2
9-009 <=> compares invoices and orders
	E1-246,2
9-010 <=> report delivery problem
	E1-020,3
9-011 <=> pick up medicine from the warehouse
	E1-246,3
9-012 <=> entrance control in the pharmacy 
	E1-092,1
	E1-069,1
9-013 <=> medicines tax receipt conference
	E1-018,2
9-014 <=> medication storage in the warehouse
	E1-035,2
9-015 <=> medicines unitarization (according to kanban) 
	E1-018,2
9-016 <=> medication storage in the warehouseunitarizados 
	E1-035,2
9-017 <=> receives medication requests for quota replacement
	E1-020,2
9-018 <=> receives requests for extra medication 
	E1-020,2
9-019 <=> extra medication request evaluation
	E1-020,2
9-020 <=> prepare medications delivery in the pharmacy
	E-EL4,1
9-021 <=> medication delivery to the AED
	E2-087,3
9-022 <=> medication delivery to the flu room
	E2-103,2
	E2-093,3
9-023 <=> medication delivery to the PED
	E2-228,3
9-024 <=> shift change 
	E1-035,2
9-025 <=> exit point 
	E1-068,3
9-026 <=> remove uniform 
	E1-009,2
	E1-012,2
9-027 <=> deposit used uniform 
	E1-007,2
9-028 <=> work closing 
	E1-001,1
////
MEDICAL ADULT EMERGENCY (E10)
10-001 <=> work arrival 
	E1-001,1
10-002 <=> pick up clean uniform 
	E1-007,2
10-003 <=> wear uniform 
	E1-009,2
	E1-012,2
10-004 <=> entry  point 
	E2-398,3
10-005 <=> equip PPE* in entry into the flu-room
	E2-103,2
10-006 <=> checking procedures of medical records and exams
	E2-055,2
10-007 <=> care for patients under observation
	E2-021,3
	E2-044,3
	E2-079,3
10-008 <=> disposal PPE 
	E2-114,2
10-009 <=> triage and 1st service
	E2-056,2
10-010 <=> care guidance and filling out the medical record
	E2-100,3
10-011 <=> shift change 
	E2-202,2
10-012 <=> kanban meeting
	E2-182,3
10-013 <=> checking procedures of medical records and exams
	E2-143,2
10-014 <=> care for patients under observation
	E2-095,3
10-015 <=> equip PPE
	E2-126,2
	E2-158,2
	E2-207,2
	E2-157,2
10-016 <=> care for patients with unstable emergencies
	E2-158,3
10-017 <=> care for patients with contagious infection
	E2-126,3
10-018 <=> care for trauma patients
	E2-157,3
10-019 <=> disposal PPE
	E2-126,2
	E2-158,2
	E2-207,2
	E2-157,2
10-020 <=> prescription verification and medication withdrawal
	E2-087,3
	E2-062,3
10-021 <=> checking medical records and calling the patient
	E2-123,2
10-022 <=> doctor's appointments
	E2-025,3
	E2-051,3
	E2-074,3
	E2-085,3
	E2-092,3
10-023 <=> triage and 1st serviceda emergencia
	E2-182,2
10-024 <=> social service request
	E2-141,2
10-025 <=> X-ray exam
	E2-496,3
10-026 <=> endoscopy exam
	E2-606,3
10-027 <=> do electroencephalogram
	E2-716,3
10-028 <=> do hemodialysis
	E2-754,3
10-029 <=> ICU stay
	E-EL2,1
10-030 <=> risk rating
	E2-076,2
10-031 <=> stable patient triage
	E2-019,3
	E2-046,3
	E2-067,3
	E2-090,3
	E2-110,3	
10-032 <=> non-emergency patient waiting
	E2-088,2
10-033 <=> patient waiting with stable emergency
	E2-112,2
10-034 <=> exam request
	E2-025,2
	E2-051,2
	E2-074,2
	E2-085,2
	E2-092,2
10-035 <=> exam collection
	E2-196,2
10-036 <=> exam delivery
	E2-159,2
10-037 <=> exit point
	E2-398,3
10-038 <=> remove uniform
	E1-009,2
	E1-012,2
10-039 <=> deposit used uniform
	E1-007,2
10-040 <=> work closing 
	E1-001,1
////
SECURITY (E12)
12-001 <=> work arrival
	E0-003,1
12-002 <=> wear uniform
	E1-009,2
	E1-012,2
12-003 <=> entry  point
	E0-003,1
12-004 <=> reception and control of security guards entry point 
	E0-003,2
12-005 <=> service order
	E0-003,3
12-006 <=> leadership guidance
	E2-270,2
12-007 <=> stations inspection
	E1-031,3
	E1-270,3
	E2-003,3
	E2-015,3
	E2-123,3
	E2-135,3
	E2-249,3
	E3-095,3
12-008 <=> triage of ambulances and AED entry 
	E2-015,2
	E2-042,2
12-009 <=> triage of internal AED entry  and orientation
	E2-003,2
12-010 <=> monitoring and information
	E2-003,2
	E2-076,2
12-011 <=> shift change
	E0-003,3
12-012 <=> exit point
	E0-003,1
12-013 <=> remove uniform
	E1-009,2
	E1-012,2
12-014 <=> work closing 
	E0-003,1
////
EQUIPMENT MAINTENANCE (E13)
13-001 <=> work arrival
	E0-001,2
13-002 <=> entry  point
	E0-001,2
13-003 <=> maintenance request
	E0-001,3
13-004 <=> maintenance service details
	E3-161,2
	E3-169,2
13-005 <=> pick up equipment at the maintenance base
	E0-001,2
13-006 <=> maintenance area isolation - faulty environment
	E2-021,2
	E2-025,2
	E2-041,2
	E2-042,2
	E2-044,2
	E2-051,2
	E2-055,2
	E2-056,2
	E2-059,2
	E2-062,2
	E2-074,2
	E2-077,2
	E2-079,2
	E2-085,2
	E2-087,2
	E2-092,2
	E2-093,2
	E2-095,2
	E2-099,2
	E2-103,2
	E2-111,2
	E2-112,2
	E2-113,2
	E2-123,2
	E2-126,2
	E2-129,2
	E2-143,2
	E2-157,2
	E2-158,2
	E2-182,2
	E2-192,2
	E2-202,2
	E2-207,2
	E2-212,2
13-007 <=> preventive cleaning (monthly)
	E2-021,3
	E2-025,3
	E2-041,3
	E2-042,3
	E2-044,3
	E2-051,3
	E2-055,3
	E2-056,3
	E2-059,3
	E2-062,3
	E2-074,3
	E2-077,3
	E2-079,3
	E2-085,3
	E2-087,3
	E2-092,3
	E2-093,3
	E2-095,3
	E2-099,3
	E2-103,3
	E2-111,3
	E2-112,3
	E2-113,3
	E2-123,3
	E2-126,3
	E2-129,3
	E2-143,3
	E2-157,3
	E2-158,3
	E2-182,3
	E2-192,3
	E2-202,3
	E2-207,3
	E2-212,3
13-008 <=> air conditioning (AC) drain check and repair
	E2-021,2
	E2-025,2
	E2-041,2
	E2-042,2
	E2-044,2
	E2-051,2
	E2-055,2
	E2-056,2
	E2-059,2
	E2-062,2
	E2-074,2
	E2-077,2
	E2-079,2
	E2-085,2
	E2-087,2
	E2-092,2
	E2-093,2
	E2-095,2
	E2-099,2
	E2-103,2
	E2-111,2
	E2-112,2
	E2-113,2
	E2-123,2
	E2-126,2
	E2-129,2
	E2-143,2
	E2-157,2
	E2-158,2
	E2-182,2
	E2-192,2
	E2-202,2
	E2-207,2
	E2-212,2
13-009 <=> AC condenser check and repair
	E2-021,2
	E2-025,2
	E2-041,2
	E2-042,2
	E2-044,2
	E2-051,2
	E2-055,2
	E2-056,2
	E2-059,2
	E2-062,2
	E2-074,2
	E2-077,2
	E2-079,2
	E2-085,2
	E2-087,2
	E2-092,2
	E2-093,2
	E2-095,2
	E2-099,2
	E2-103,2
	E2-111,2
	E2-112,2
	E2-113,2
	E2-123,2
	E2-126,2
	E2-129,2
	E2-143,2
	E2-157,2
	E2-158,2
	E2-182,2
	E2-192,2
	E2-202,2
	E2-207,2
	E2-212,2
13-010 <=> AC evaporator electronic board reset
	E2-021,2
	E2-025,2
	E2-041,2
	E2-042,2
	E2-044,2
	E2-051,2
	E2-055,2
	E2-056,2
	E2-059,2
	E2-062,2
	E2-074,2
	E2-077,2
	E2-079,2
	E2-085,2
	E2-087,2
	E2-092,2
	E2-093,2
	E2-095,2
	E2-099,2
	E2-103,2
	E2-111,2
	E2-112,2
	E2-113,2
	E2-123,2
	E2-126,2
	E2-129,2
	E2-143,2
	E2-157,2
	E2-158,2
	E2-182,2
	E2-192,2
	E2-202,2
	E2-207,2
	E2-212,2
13-011 <=> AC evaporator gas pressure measurement
	E2-021,2
	E2-025,2
	E2-041,2
	E2-042,2
	E2-044,2
	E2-051,2
	E2-055,2
	E2-056,2
	E2-059,2
	E2-062,2
	E2-074,2
	E2-077,2
	E2-079,2
	E2-085,2
	E2-087,2
	E2-092,2
	E2-093,2
	E2-095,2
	E2-099,2
	E2-103,2
	E2-111,2
	E2-112,2
	E2-113,2
	E2-123,2
	E2-126,2
	E2-129,2
	E2-143,2
	E2-157,2
	E2-158,2
	E2-182,2
	E2-192,2
	E2-202,2
	E2-207,2
	E2-212,2
13-012 <=> pick up fluid cylinder to replace (if necessary) 
	E2-021,2
	E2-025,2
	E2-041,2
	E2-042,2
	E2-044,2
	E2-051,2
	E2-055,2
	E2-056,2
	E2-059,2
	E2-062,2
	E2-074,2
	E2-077,2
	E2-079,2
	E2-085,2
	E2-087,2
	E2-092,2
	E2-093,2
	E2-095,2
	E2-099,2
	E2-103,2
	E2-111,2
	E2-112,2
	E2-113,2
	E2-123,2
	E2-126,2
	E2-129,2
	E2-143,2
	E2-157,2
	E2-158,2
	E2-182,2
	E2-192,2
	E2-202,2
	E2-207,2
	E2-212,2
13-013 <=> AC evaporator refrigerant fluid recharge 
	E2-021,2
	E2-025,2
	E2-041,2
	E2-042,2
	E2-044,2
	E2-051,2
	E2-055,2
	E2-056,2
	E2-059,2
	E2-062,2
	E2-074,2
	E2-077,2
	E2-079,2
	E2-085,2
	E2-087,2
	E2-092,2
	E2-093,2
	E2-095,2
	E2-099,2
	E2-103,2
	E2-111,2
	E2-112,2
	E2-113,2
	E2-123,2
	E2-126,2
	E2-129,2
	E2-143,2
	E2-157,2
	E2-158,2
	E2-182,2
	E2-192,2
	E2-202,2
	E2-207,2
	E2-212,2
13-014 <=> storing tools and cleaning the activity area
	E2-021,2
	E2-025,2
	E2-041,2
	E2-042,2
	E2-044,2
	E2-051,2
	E2-055,2
	E2-056,2
	E2-059,2
	E2-062,2
	E2-074,2
	E2-077,2
	E2-079,2
	E2-085,2
	E2-087,2
	E2-092,2
	E2-093,2
	E2-095,2
	E2-099,2
	E2-103,2
	E2-111,2
	E2-112,2
	E2-113,2
	E2-123,2
	E2-126,2
	E2-129,2
	E2-143,2
	E2-157,2
	E2-158,2
	E2-182,2
	E2-192,2
	E2-202,2
	E2-207,2
	E2-212,2
13-015 <=> deposit equipment at the maintenance base
	E0-001,2
13-016 <=> exit point
	E0-001,2
13-017 <=> work closing 
	E0-001,2
////
NUTRITION (E14)
14-001 <=> work arrival
	E1-001,1
14-002 <=> pick up clean uniform limpo
	E1-007,2
14-003 <=> wear uniform
	E1-009,2
	E1-012,2
14-004 <=> entry point
	E1-068,3
14-005 <=> conference requests and food distribution
	E1-217,3
14-006 <=> prescription form processing and food reservation
	E1-217,2
14-007 <=> dietary prescriptions collection in the PED
	E2-269,3
14-008 <=> breastfeeding reserve conference in the PED 
	E2-183,3
14-009 <=> dietary prescriptions collection in the AED*
	E2-143,3
14-010 <=> dietary prescriptions collection in flu room 
	E2-087,3
14-011 <=> collected prescriptions scanning 
	E1-210,2
14-012 <=> diets definition (based on stocks)
	E1-210,2
14-013 <=> diet labels preparing and printing
	E1-210,2
14-014 <=> labels delivery and cook orientation
	E1-207,2
	E1-152,3
14-015 <=> individualized food units (IFUs) assembly
	E1-148,2
	E1-180,2
	E1-188,2
14-016 <=> individualized food units (IFUs) assembly
	E1-152,3
	E1-143,3
14-017 <=> IFUs distribution in the PED
	E2-269,3
	E2-255,3
	E2-283,3
	E2-173,3
	E2-175,3
	E2-176,3
	E2-174,3
14-018 <=> lactating reserve replenishment in the PED 
	E2-183,3
14-019 <=> IFUs delivery to the flu room
	E2-103,2
14-020 <=> IFUs distribution in the flu room
	E2-021,3
	E2-044,3
	E2-056,3
	E2-079,3
	E2-099,3
	E2-113,3
14-021 <=> IFUs distribution in the EAD
	E2-095,3
	E2-126,3
14-022 <=> receipt of the lactating request
	E1-194,2
	E1-210,2
14-023 <=> lactating preparation
	E1-194,3
14-024 <=> food supplies receiving
	E1-214,2
14-025 <=> food supplies storage
	E1-131,3
	E1-148,3
	E1-188,3
14-026 <=> inventory food control
	E1-163,2
14-027 <=> exit point
	E1-068,2
14-028 <=> remove uniform
	E1-009,2
	E1-012,2
14-029 <=> deposit used uniform
	E1-007,2
14-030 <=> work closing 
	E1-001,1
14-031 <=> food supply order
	E1-131,2
	E1-148,2
	E1-188,2
14-032 <=> food supply order
	E1-217,2
////
AED CONSUMPTION MATERIALS REPLACEMENT (E15)
15-001 <=> work arrival
	E1-001,1
15-002 <=> pick up clean uniform 
	E1-007,2
15-003 <=> wear uniform 
	E1-009,2
	E1-012,2
15-004 <=> entry point
	E2-398,3
15-005 <=> PPE provision for AED staff
	E2-059,3
15-006 <=> verification of AED consumption material demands
	E2-059,2
15-007 <=> service orders issuance for hospitality
	E2-059,2
15-008 <=> reception and detailing of hospital linen demands
	E2-182,3
15-009 <=> broken clinical equipment replacement
	E2-095,3
	E2-126,3
	E2-158,3
	E2-157,3
	E2-207,3
15-010 <=> consumables inventory check
	E2-059,2
15-011 <=> consumption material replacement 
	E2-095,3
	E2-158,3
	E2-157,3
	E2-207,3
15-012 <=> used reusable consumption material collection
	E2-212,2
15-013 <=> delivery of material collected for sterilization
	E1-099,2
15-014 <=> pick up sterilized consumption material 
	E1-132,2
15-015 <=> sterilized consumption material storage
	E2-059,3
15-016 <=> pick up common consumption material
	E1-246,2
15-017 <=> common consumption material storage 
	E2-059,3
15-018 <=> oxygen and material check-in in the ambulances
	E0-004,2
15-019 <=> oxygen and material replacement in the ambulances
	E0-004,3
15-020 <=> office and computer supplies replacement in the AED
	E2-699,3
15-021 <=> exit point
	E2-398,2
15-022 <=> remove uniform
	E1-009,2
	E1-012,2
15-023 <=> deposit used uniform
	E1-007,2
15-024 <=> work closing 
	E1-001,1
