# Supplementary material
Source: MDPI journal article supplement (https://www.mdpi.com/2076-3417/13/3/1599)
Supplement: s1 [file s1 › S08-relationship_matrix.xlsx]

## Sheet: relationship
	Activity by Environment	Environments	elevador	elevador	elevador	elevador	elevador	elevador	elevador	elevador	elevador	maintenance base building	waste deposit building	security center building	ambulance and machine garage	external area	circulation	clothing room (rouparia)	men's locker room - bathroom	women's locker room - bathroom	circulation	pharmacy deposit	pharmacy management	Psychopharmaceuticals room	locker room - bathroom	circulation	pharmacy stock	circulation	circulation	pharmaceutical office	dispensation	pharmacy classroom	stairs (to the 2nd floor)	circulation	sanitizers	elevators hall	elevators hall	elevators hall	circulation	circulation	cleaning service deposit	liquid deposit	sterilized materials deposit	locker room-bathroom	packaging of salads and desserts	industrial kitchen	break room-uniform stock	dirty laundry deposit	food pantry
	Activities	ID	E-EL1	E-EL2	E-EL3	E-EL4	E-EL5	E-EL6	E-EL7	E-EL8	E-EL9	E0-001	E0-002	E0-003	E0-004	E1-001	E1-005	E1-007	E1-009	E1-012	E1-015	E1-018	E1-020	E1-022	E1-023	E1-031	E1-035	E1-068	E1-069	E1-078	E1-080	E1-090	E1-091	E1-092	E1-099	E1-103	E1-105	E1-107	E1-118	E1-124	E1-128	E1-131	E1-132	E1-138	E1-140	E1-143	E1-145	E1-147	E1-148
	work arrival	1-001														1
	entry point	1-002																										3
	scheduling and discharges RCOHS*	1-003
	employee point control	1-004
	employee absence justification	1-005
	forwarding employee leave documents	1-006
	signatures conference of medical reports	1-007
	supervision of healthcare services and statistics	1-008
	conflict management	1-009
	appointment center monitoring	1-010
	medical report filing	1-011
	medical report request	1-012
	medical report collection and report standardization	1-013
	signature of the medical report	1-014
	report delivery to the patien	1-015
	medical care or exame scheduling	1-016
	medical care or exame date change	1-017
	exit point	1-018																										3
	work closing	1-019														1
	work arrival	10-001														1
	pick up clean uniform	10-002																2
	wear uniform	10-003																	2	2
	entry point	10-004
	equip PPE* in entry into the flu-room	10-005
	checking procedures of medical records and exams	10-006
	care for patients under observation	10-007
	disposal of trimmings	10-008
	triage and 1st service	10-009
	care guidance and filling out the medical record	10-010
	shift change	10-011
	kanban meeting	10-012
	checking procedures of medical records and exams	10-013
	care for patients under observation	10-014
	attire	10-015
	care for patients with unstable emergencies	10-016
	care for patients with contagious infection	10-017
	care for trauma patients	10-018
	undressing	10-019
	prescription verification and medication withdrawal	10-020
	checking medical records and calling the patient	10-021
	doctor's appointments	10-022
	triage and 1st emergency care	10-023
	social service request	10-024
	X-ray exam	10-025
	endoscopy exam	10-026
	do electroencephalogram	10-027
	do hemodialysis	10-028
	ICU* stay	10-029		1
	risk rating	10-030
	stable patient triage	10-031
	non-emergency patient waiting	10-032
	patient waiting with stable emergency	10-033
	exam request	10-034
	exam collection	10-035
	exam delivery	10-036
	exit point	10-037
	wear uniform	10-038																	2	2
	deposit used uniform	10-039																2
	work closing	10-040														1
	work arrival	12-001												1
	wear uniform	12-002																	2	2
	entry point	12-003												1
	reception and control of security guards entry point	12-004												2
	service order	12-005												3
	leadership guidance	12-006
	stations inspection	12-007																								3
	triage of ambulances and AED entry	12-008
	triage of internal AED entry and orientation	12-009
	monitoring and information	12-010
	security shift change	12-011												3
	exit point	12-012												1
	desveste uniforme	12-013																	2	2
	work closing	12-014												1
	work arrival	13-001										2
	entry point	13-002										2
	maintenance request	13-003										3
	maintenance service details	13-004
	pick up equipment at the maintenance base	13-005										2
	maintenance area isolation - faulty environment	13-006
	preventive cleaning (monthly)	13-007
	air conditioning (AC) drain check and repair	13-008
	AC condenser check and repair	13-009
	AC evaporator electronic board reset	13-010
	AC evaporator gas pressure measurement	13-011
	pick up fluid cylinder to replace (if necessary)	13-012
	AC evaporator refrigerant fluid recharge	13-013
	storing tools and cleaning the activity area	13-014
	deposit equipment at the maintenance base	13-015										2
	exit point	13-016										2
	work closing	13-017										2
	work arrival	14-001														1
	pick up clean uniform	14-002																2
	wear uniform	14-003																	2	2
	entry point	14-004																										3
	conference requests and food distribution	14-005
	prescription form processing and food reservation	14-006
	dietary prescriptions collection in the PED*	14-007
	breastfeeding reserve conference in the PED	14-008
	dietary prescriptions collection in the AED*	14-009
	dietary prescriptions collection in flu room	14-010
	collected prescriptions scanning	14-011
	diets definition (based on stocks)	14-012
	diet labels preparing and printing	14-013
	labels delivery and cook orientation	14-014
	food separation used in plate assembly	14-015																																															2
	individualized food units (IFUs) assembly	14-016																																												3
	IFUs distribution in the PED	14-017
	lactating reserve replenishment in the PED	14-018
	IFUs delivery to the flu room	14-019
	IFUs distribution in the flu room	14-020
	IFUs distribution in the EAD	14-021
	receipt of the lactating request	14-022
	lactating preparation	14-023
	food supplies receiving	14-024
	food supplies storage	14-025																																								3							3
	inventory food control	14-026
	food supplies conference	14-031																																								2							2
	food supply order	14-032
	exit point	14-027																										2
	remove uniform	14-028																	2	2
	deposit used uniform	14-029																2
	work closing	14-030														1
	work arrival	15-001														1
	pick up clean uniform	15-002																2
	vestimenta uniforme	15-003																	2	2
	entry point	15-004
	PPE provision for AED staff	15-005
	verification of AED consumption material demands	15-006
	service orders issuance for hospitality	15-007
	reception and detailing of hospital linen demands	15-008
	broken clinical equipment replacement	15-009
	consumables inventory check	15-010
	consumption material replacement	15-011
	used reusable consumption material collection	15-012
	delivery of material collected for sterilization	15-013																																	2
	pick up sterilized consumption material	15-014																																									2
	sterilized consumption material storage	15-015
	pick up common consumption material	15-016
	common consumption material storage	15-017
	oxygen and material check-in in the ambulances	15-018													2
	oxygen and material replacement in the ambulances	15-019													3
	office and computer supplies replacement in the AED	15-020
	exit point	15-021
	desveste uniforme	15-022																	2	2
	deposita uniforme usado	15-023																2
	work closing	15-024														1
	work arrival	2-001														1
	pick up clean uniform	2-002																3
	wear uniform	2-003																	3	3
	entry point	2-004
	daily distribution of AED activity and staff	2-005
	monthly staff schedule management	2-006
	AED staff meeting	2-007
	AED staff points control	2-008
	forwarding AED demands (for email, calls, etc.)	2-009
	completing monthly report sheets	2-010
	monthly report submission	2-011
	nursing care supervision in AED	2-012
	ambulance emergency patient reception	2-013
	spontaneous demand for the AED	2-014
	spontaneous demand triage	2-015
	clinical evaluation of the patient received	2-016
	patient classification and referral	2-017
	initial clinical care	2-018
	referral for exams	2-019
	carrying out the exams	2-020
	medical diagnosis and stable patient prescription	2-021
	referral for observation	2-022
	nursing care for stable patients	2-023
	nursing care for unstable patients	2-024
	nursing care for contagious patients	2-025
	nursing care for trauma patients	2-026
	medication preparation	2-027
	medication distribution	2-028
	materials replacement	2-029
	materials distribution	2-030
	waste removal - dirty materials center AED	2-031
	exit point	2-032
	remove uniform	2-033																	3	3
	deposit used uniform	2-034																3
	work closing	2-035														1
	work arrival of the hospitality division head	3-001
	work arrival of hospitality staff	3-002														2
	material inventory control	3-003
	satisfaction survey	3-004
	satisfaction survey report	3-005
	hospitality services quality inspection	3-006																																														3
	hospitality staff points control	3-007
	outsourced hospitality service management	3-008
	hygiene services management	3-009																																														2
	pest control management	3-010																																														2
	hospital waste service management	3-011																																														2
	hygiene, pest, and waste services inspection	3-012																																														3
	hospital waste removal from the AED	3-013
	hospital waste removal from the PED	3-014
	hospital waste deposit at the waste center	3-015
	hospital waste collection of discarded	3-016					1						3
	hospital waste types selection and separation	3-017											3
	common waste deposit	3-018											3
	infectious hospital waste deposit	3-019											3
	chemical hospital waste deposit	3-020											3
	outsourced cleaning staff control	3-021
	cleaning activities distribution	3-022
	pick up PPE outfitting	3-023																																										3
	cleaning modules preparation	3-024																																							3
	cleaning of PED environments	3-025
	cleaning of AED environments	3-026
	cleaning of circulations	3-027
	cleaning materials purchase request	3-032
	cleaning materials purchase reception	3-028
	cleaning supplies stock	3-029
	pick up cleaning consumables	3-030
	work closing	3-031														2
	work arrival	4-001
	entry point	4-002
	repair requests occurrence analysis	4-003
	physical modification proposals analysis	4-004
	forwarding internal services	4-005
	outsourcing service quote request	4-006
	request-proposal approval	4-007
	maintenance service start	4-008					1					2				1
	pick up repair work order	4-009
	repair site inspection	4-010
	repair material request	4-011
	staff mobilization for maintenance service	4-012										3
	purchased material reception	4-013
	pick up material and equipment	4-014
	air conditioner repair request execution	4-015
	water system repair request execution	4-016																																														3
	sewer system repair request execution	4-017
	electrical system repair request execution	4-018
	fluid system repair request execution	4-019
	joinery repair request execution	4-020										2
	building repair request execution	4-021
	contracting equipment and furniture repair service	4-022
	equipment and furniture removal for the warehouse	4-023										2
	equipment and furniture removal from warehouse	4-024										2
	equipment and furniture return for the warehouse	4-025										2
	equipment and furniture return for the use place	4-026										2
	air conditioning OMPC* inspection	4-027
	exit point	4-028
	work closing	4-029
	work arrival and entry point	5-001														1
	laundry delivery	5-002
	delivered clothes weighing	5-003
	parking of cages (large)	5-004
	transfer to delivery cages (medium)	5-005
	linen kit distribution start	5-006						1
	hospital linen replacement in the PED	5-007
	hospital linen replacement in the flu room	5-008
	hospital linen replacement in the AED	5-009
	return to the clean linen sector	5-018						1
	dirty laundry collection start	5-019
	wear PPE for collection activity	5-020																																										2
	pick up collection cages (large)	5-021																																														2
	departure for laundry collection	5-022																																														2
	laundry collection from the PED	5-023
	laundry collection from the flu room	5-024
	laundry collection from the AED	5-025
	return to the laundry sector	5-026																																														2
	laundry weighing	5-027																																														2
	depositing dirty clothes in the get-out cage (large)	5-028																																														3
	take get-out cage for laundry transport	5-229																																														2
	transporting dirty laundry for washing	5-030
	administrative activities	5-031
	sewing and repair activities	5-032
	assembly of sterilized vestments	5-033
	fault finding in clothes	5-034
	work closing	5-035														1
	patient arrival	7-001
	patient referral for identification	7-002
	patient identification	7-003
	password withdrawal for ES registration	7-004
	identification wait	7-005
	registry card emission and identification (bracelet)	7-006
	classification wait	7-007
	classification	7-008
	referral to the clinics	7-009
	referral to the exams	7-010
	referral to the PED	7-011
	referral to the AED	7-012
	records collection for registration and statistics	7-013
	pick up patient cards in the PED	7-014
	pick up patient cards in the obstetric	7-015
	pick up patient cards in the AED	7-016
	pick up patient cards in the flu room	7-017
	card processing (quantifies, organizes, and archives)	7-018
	call an obstetrician for pregnancy screening	7-019
	processing registration and statistics report	7-020
	referral patient for the flu room	7-021
	work arrival and entry point	7-022
	work closing	7-023
	patient visit entry	7-024
	patient visit identification	7-025
	visit forwarding to the AED	7-026
	visit to patients	7-027
	departure after the end visitation period	7-028
	work arrival	8-001														1
	pick up clean uniform	8-002																2
	wear uniform	8-003																	3	3
	entry point	8-004																										3
	AED census preparation, and print	8-005																												3
	AED kanban meeting	8-006
	patients and companions interviews	8-007
	anamnesis interviews transcription	8-008
	print the anamnesis interview	8-009																													2
	attaches the anamnesis to the patient's records	8-010
	pick up prescriptions and exams	8-011
	compares anamnesis, prescriptions, and exams	8-012
	medication interaction technical analysis	8-013
	pharmaceutical intervention	8-014
	shift change	8-015
	exit point	8-016																										3
	remove uniform	8-017																	2	2
	deposit used uniform	8-018																2
	work closing	8-019														1
	work arrival	9-001														1
	pick up clean uniform	9-002																2
	wear uniform	9-003																	3	3
	entry point	9-004																										3
	pharmacy administrative activities	9-005																					3
	technicians and pharmacy assistants supervision	9-006																					3
	medications reception	9-007
	medication storage in the warehouse	9-008
	compares invoices and orders	9-009
	report delivery problem	9-010																					3
	pick up medicine from the warehouse	9-011
	entrance control in the pharmacy	9-012																											1					1
	medicines tax receipt conference	9-013																				2
	medication storage	9-014																									2
	medicines unitarization (according to kanban)	9-015																				2
	unitary drugs storage	9-016																									2
	receives medication requests for quota replacement	9-017																					2
	receives requests for extra medication	9-018																					2
	extra medication request evaluation	9-019																					2
	prepare medications delivery in the pharmacy	9-020				1
	medication delivery to the AED	9-021
	medication delivery to the flu room	9-022
	medication delivery to the PED	9-023
	shift change	9-024																									2
	exit point	9-025																										3
	remove uniform	9-026																	2	2
	deposit used uniform	9-027																2
	work closing	9-028														1
				Legend:				1	for when it circulates in the environment j to perform the activity i																					2	for when a means activity i occurs in the environment j
[truncated: 185 more columns]

## Sheet: relationship T
	Activity by Environment	components	elevador	elevador	elevador	elevador	elevador	elevador	elevador	elevador	elevador	maintenance base building	waste deposit building	security center building	ambulance and machine garage	external area	circulation	clothing room (rouparia)	men's locker room - bathroom	women's locker room - bathroom	circulation	pharmacy deposit	pharmacy management	Psychopharmaceuticals room	locker room - bathroom	circulation	pharmacy stock	circulation	circulation	pharmaceutical office	dispensation	pharmacy classroom	stairs (to the 2nd floor)	circulation	sanitizers	elevators hall	elevators hall	elevators hall	circulation	circulation	cleaning service deposit	liquid deposit	sterilized materials deposit	locker room-bathroom	packaging of salads and desserts	industrial kitchen	break room-uniform stock	dirty laundry deposit	food pantry
	Activities	ID	E-EL1	E-EL2	E-EL3	E-EL4	E-EL5	E-EL6	E-EL7	E-EL8	E-EL9	E0-001	E0-002	E0-003	E0-004	E1-001	E1-005	E1-007	E1-009	E1-012	E1-015	E1-018	E1-020	E1-022	E1-023	E1-031	E1-035	E1-068	E1-069	E1-078	E1-080	E1-090	E1-091	E1-092	E1-099	E1-103	E1-105	E1-107	E1-118	E1-124	E1-128	E1-131	E1-132	E1-138	E1-140	E1-143	E1-145	E1-147	E1-148
	work arrival	1-001														1
	entry point	1-002																										3
	scheduling and discharges RCOHS*	1-003
	employee point control	1-004
	employee absence justification	1-005
	forwarding employee leave documents	1-006
	signatures conference of medical reports	1-007
	supervision of healthcare services and statistics	1-008
	conflict management	1-009
	appointment center monitoring	1-010
	medical report filing	1-011
	medical report request	1-012
	medical report collection and report standardization	1-013
	signature of the medical report	1-014
	report delivery to the patien	1-015
	medical care or exame scheduling	1-016
	medical care or exame date change	1-017
	exit point	1-018																										3
	work closing	1-019														1
	work arrival	10-001														1
	pick up clean uniform	10-002																2
	wear uniform	10-003																	2	2
	entry point	10-004
	equip PPE* in entry into the flu-room	10-005
	checking procedures of medical records and exams	10-006
	care for patients under observation	10-007
	disposal of trimmings	10-008
	triage and 1st service	10-009
	care guidance and filling out the medical record	10-010
	shift change	10-011
	kanban meeting	10-012
	checking procedures of medical records and exams	10-013
	care for patients under observation	10-014
	attire	10-015
	care for patients with unstable emergencies	10-016
	care for patients with contagious infection	10-017
	care for trauma patients	10-018
	undressing	10-019
	prescription verification and medication withdrawal	10-020
	checking medical records and calling the patient	10-021
	doctor's appointments	10-022
	triage and 1st emergency care	10-023
	social service request	10-024
	X-ray exam	10-025
	endoscopy exam	10-026
	do electroencephalogram	10-027
	do hemodialysis	10-028
	ICU stay	10-029		1
	risk rating	10-030
	stable patient triage	10-031
	non-emergency patient waiting	10-032
	patient waiting with stable emergency	10-033
	exam request	10-034
	exam collection	10-035
	exam delivery	10-036
	exit point	10-037
	wear uniform	10-038																	2	2
	deposit used uniform	10-039																2
	work closing	10-040														1
	work arrival	12-001												1
	wear uniform	12-002																	2	2
	entry point	12-003												1
	reception and control of security guards entry point	12-004												2
	service order	12-005												3
	leadership guidance	12-006
	stations inspection	12-007																								3
	triage of ambulances and AED entry	12-008
	triage of internal AED entry and orientation	12-009
	monitoring and information	12-010
	security shift change	12-011												3
	exit point	12-012												1
	desveste uniforme	12-013																	2	2
	work closing	12-014												1
	work arrival	13-001										2
	entry point	13-002										2
	maintenance request	13-003										3
	maintenance service details	13-004
	pick up equipment at the maintenance base	13-005										2
	maintenance area isolation - faulty environment	13-006
	preventive cleaning (monthly)	13-007
	air conditioning (AC) drain check and repair	13-008
	AC condenser check and repair	13-009
	AC evaporator electronic board reset	13-010
	AC evaporator gas pressure measurement	13-011
	pick up fluid cylinder to replace (if necessary)	13-012
	AC evaporator refrigerant fluid recharge	13-013
	storing tools and cleaning the activity area	13-014
	deposit equipment at the maintenance base	13-015										2
	exit point	13-016										2
	work closing	13-017										2
	work arrival	14-001														1
	pick up clean uniform	14-002																2
	wear uniform	14-003																	2	2
	entry point	14-004																										3
	conference requests and food distribution	14-005
	prescription form processing and food reservation	14-006
	dietary prescriptions collection in the PED*	14-007
	breastfeeding reserve conference in the PED	14-008
	dietary prescriptions collection in the AED*	14-009
	dietary prescriptions collection in flu room	14-010
	collected prescriptions scanning	14-011
	diets definition (based on stocks)	14-012
	diet labels preparing and printing	14-013
	labels delivery and cook orientation	14-014
	food separation used in plate assembly	14-015																																															2
	individualized food units (IFUs) assembly	14-016																																												3
	IFUs distribution in the PED	14-017
	lactating reserve replenishment in the PED	14-018
	IFUs delivery to the flu room	14-019
	IFUs distribution in the flu room	14-020
	IFUs distribution in the EAD	14-021
	receipt of the lactating request	14-022
	lactating preparation	14-023
	food supplies receiving	14-024
	food supplies storage	14-025																																								3							3
	inventory food control	14-026
	food supplies conference	14-031																																								2							2
	food supply order	14-032
	exit point	14-027																										2
	remove uniform	14-028																	2	2
	deposit used uniform	14-029																2
	work closing	14-030														1
	work arrival	15-001														1
	pick up clean uniform	15-002																2
	vestimenta uniforme	15-003																	2	2
	entry point	15-004
	PPE provision for AED staff	15-005
	verification of AED consumption material demands	15-006
	service orders issuance for hospitality	15-007
	reception and detailing of hospital linen demands	15-008
	broken clinical equipment replacement	15-009
	consumables inventory check	15-010
	consumption material replacement	15-011
	used reusable consumption material collection	15-012
	delivery of material collected for sterilization	15-013																																	2
	pick up sterilized consumption material	15-014																																									2
	sterilized consumption material storage	15-015
	pick up common consumption material	15-016
	common consumption material storage	15-017
	oxygen and material check-in in the ambulances	15-018													2
	oxygen and material replacement in the ambulances	15-019													3
	office and computer supplies replacement in the AED	15-020
	exit point	15-021
	desveste uniforme	15-022																	2	2
	deposita uniforme usado	15-023																2
	work closing	15-024														1
	work arrival	2-001														1
	pick up clean uniform	2-002																3
	wear uniform	2-003																	3	3
	entry point	2-004
	daily distribution of AED activity and staff	2-005
	monthly staff schedule management	2-006
	AED staff meeting	2-007
	AED staff points control	2-008
	forwarding AED demands (for email, calls, etc.)	2-009
	completing monthly report sheets	2-010
	monthly report submission	2-011
	nursing care supervision in AED	2-012
	ambulance emergency patient reception	2-013
	spontaneous demand for the AED	2-014
	spontaneous demand triage	2-015
	clinical evaluation of the patient received	2-016
	patient classification and referral	2-017
	initial clinical care	2-018
	referral for exams	2-019
	carrying out the exams	2-020
	medical diagnosis and stable patient prescription	2-021
	referral for observation	2-022
	nursing care for stable patients	2-023
	nursing care for unstable patients	2-024
	nursing care for contagious patients	2-025
	nursing care for trauma patients	2-026
	medication preparation	2-027
	medication distribution	2-028
	materials replacement	2-029
	materials distribution	2-030
	waste removal - dirty materials center AED	2-031
	exit point	2-032
	remove uniform	2-033																	3	3
	deposit used uniform	2-034																3
	work closing	2-035														1
	work arrival of the hospitality division head	3-001
	work arrival of hospitality staff	3-002														2
	material inventory control	3-003
	satisfaction survey	3-004
	satisfaction survey report	3-005
	hospitality services quality inspection	3-006																																														3
	hospitality staff points control	3-007
	outsourced hospitality service management	3-008
	hygiene services management	3-009																																														2
	pest control management	3-010																																														2
	hospital waste service management	3-011																																														2
	hygiene, pest, and waste services inspection	3-012																																														3
	hospital waste removal from the AED	3-013
	hospital waste removal from the PED	3-014
	hospital waste deposit at the waste center	3-015
	hospital waste collection of discarded	3-016					1						3
	hospital waste types selection and separation	3-017											3
	common waste deposit	3-018											3
	infectious hospital waste deposit	3-019											3
	chemical hospital waste deposit	3-020											3
	outsourced cleaning staff control	3-021
	cleaning activities distribution	3-022
	pick up PPE outfitting	3-023																																										3
	cleaning modules preparation	3-024																																							3
	cleaning of PED environments	3-025
	cleaning of AED environments	3-026
	cleaning of circulations	3-027
	cleaning materials purchase request	3-032
	cleaning materials purchase reception	3-028
	cleaning supplies stock	3-029
	pick up cleaning consumables	3-030
	work closing	3-031														2
	work arrival	4-001
	entry point	4-002
	repair requests occurrence analysis	4-003
	physical modification proposals analysis	4-004
	forwarding internal services	4-005
	outsourcing service quote request	4-006
	request-proposal approval	4-007
	maintenance service start	4-008					1					2				1
	pick up repair work order	4-009
	repair site inspection	4-010
	repair material request	4-011
	staff mobilization for maintenance service	4-012										3
	purchased material reception	4-013
	pick up material and equipment	4-014
	air conditioner repair request execution	4-015
	water system repair request execution	4-016																																														3
	sewer system repair request execution	4-017
	electrical system repair request execution	4-018
	fluid system repair request execution	4-019
	joinery repair request execution	4-020										2
	building repair request execution	4-021
	contracting equipment and furniture repair service	4-022
	equipment and furniture removal for the warehouse	4-023										2
	equipment and furniture removal from warehouse	4-024										2
	equipment and furniture return for the warehouse	4-025										2
	equipment and furniture return for the use place	4-026										2
	air conditioning OMPC* inspection	4-027
	exit point	4-028
	work closing	4-029
	work arrival and entry point	5-001														1
	laundry delivery	5-002
	delivered clothes weighing	5-003
	parking of cages (large)	5-004
	transfer to delivery cages (medium)	5-005
	linen kit distribution start	5-006						1
	hospital linen replacement in the PED	5-007
	hospital linen replacement in the flu room	5-008
	hospital linen replacement in the AED	5-009
	return to the clean linen sector	5-018						1
	dirty laundry collection start	5-019
	wear PPE for collection activity	5-020																																										2
	pick up collection cages (large)	5-021																																														2
	departure for laundry collection	5-022																																														2
	laundry collection from the PED	5-023
	laundry collection from the flu room	5-024
	laundry collection from the AED	5-025
	return to the laundry sector	5-026																																														2
	laundry weighing	5-027																																														2
	depositing dirty clothes in the get-out cage (large)	5-028																																														3
	take get-out cage for laundry transport	5-229																																														2
	transporting dirty laundry for washing	5-030
	administrative activities	5-031
	sewing and repair activities	5-032
	assembly of sterilized vestments	5-033
	fault finding in clothes	5-034
	work closing	5-035														1
	patient arrival	7-001
	patient referral for identification	7-002
	patient identification	7-003
	password withdrawal for ES registration	7-004
	identification wait	7-005
	registry card emission and identification (bracelet)	7-006
	classification wait	7-007
	classification	7-008
	referral to the clinics	7-009
	referral to the exams	7-010
	referral to the PED	7-011
	referral to the AED	7-012
	records collection for registration and statistics	7-013
	pick up patient cards in the PED	7-014
	pick up patient cards in the obstetric	7-015
	pick up patient cards in the AED	7-016
	pick up patient cards in the flu room	7-017
	card processing (quantifies, organizes, and archives)	7-018
	call an obstetrician for pregnancy screening	7-019
	processing registration and statistics report	7-020
	referral patient for the flu room	7-021
	work arrival and entry point	7-022
	work closing	7-023
	patient visit entry	7-024
	patient visit identification	7-025
	visit forwarding to the AED	7-026
	visit to patients	7-027
	departure after the end visitation period	7-028
	work arrival	8-001														1
	pick up clean uniform	8-002																2
	wear uniform	8-003																	3	3
	entry point	8-004																										3
	AED census preparation, and print	8-005																												3
	AED kanban meeting	8-006
	patients and companions interviews	8-007
	anamnesis interviews transcription	8-008
	print the anamnesis interview	8-009																													2
	attaches the anamnesis to the patient's records	8-010
	pick up prescriptions and exams	8-011
	compares anamnesis, prescriptions, and exams	8-012
	medication interaction technical analysis	8-013
	pharmaceutical intervention	8-014
	shift change	8-015
	exit point	8-016																										3
	remove uniform	8-017																	2	2
	deposit used uniform	8-018																2
	work closing	8-019														1
	work arrival	9-001														1
	pick up clean uniform	9-002																2
	wear uniform	9-003																	3	3
	entry point	9-004																										3
	pharmacy administrative activities	9-005																					3
	technicians and pharmacy assistants supervision	9-006																					3
	medications reception	9-007
	medication storage in the warehouse	9-008
	compares invoices and orders	9-009
	report delivery problem	9-010																					3
	pick up medicine from the warehouse	9-011
	entrance control in the pharmacy	9-012																											1					1
	medicines tax receipt conference	9-013																				2
	medication storage	9-014																									2
	medicines unitarization (according to kanban)	9-015																				2
	unitary drugs storage	9-016																									2
	receives medication requests for quota replacement	9-017																					2
	receives requests for extra medication	9-018																					2
	extra medication request evaluation	9-019																					2
	prepare medications delivery in the pharmacy	9-020				1
	medication delivery to the AED	9-021
	medication delivery to the flu room	9-022
	medication delivery to the PED	9-023
	shift change	9-024																									2
	exit point	9-025																										3
	remove uniform	9-026																	2	2
	deposit used uniform	9-027																2
	work closing	9-028														1
[truncated: 185 more columns]
