# Supplementary material
Source: MDPI journal article supplement (https://www.mdpi.com/2076-3417/13/3/1599)

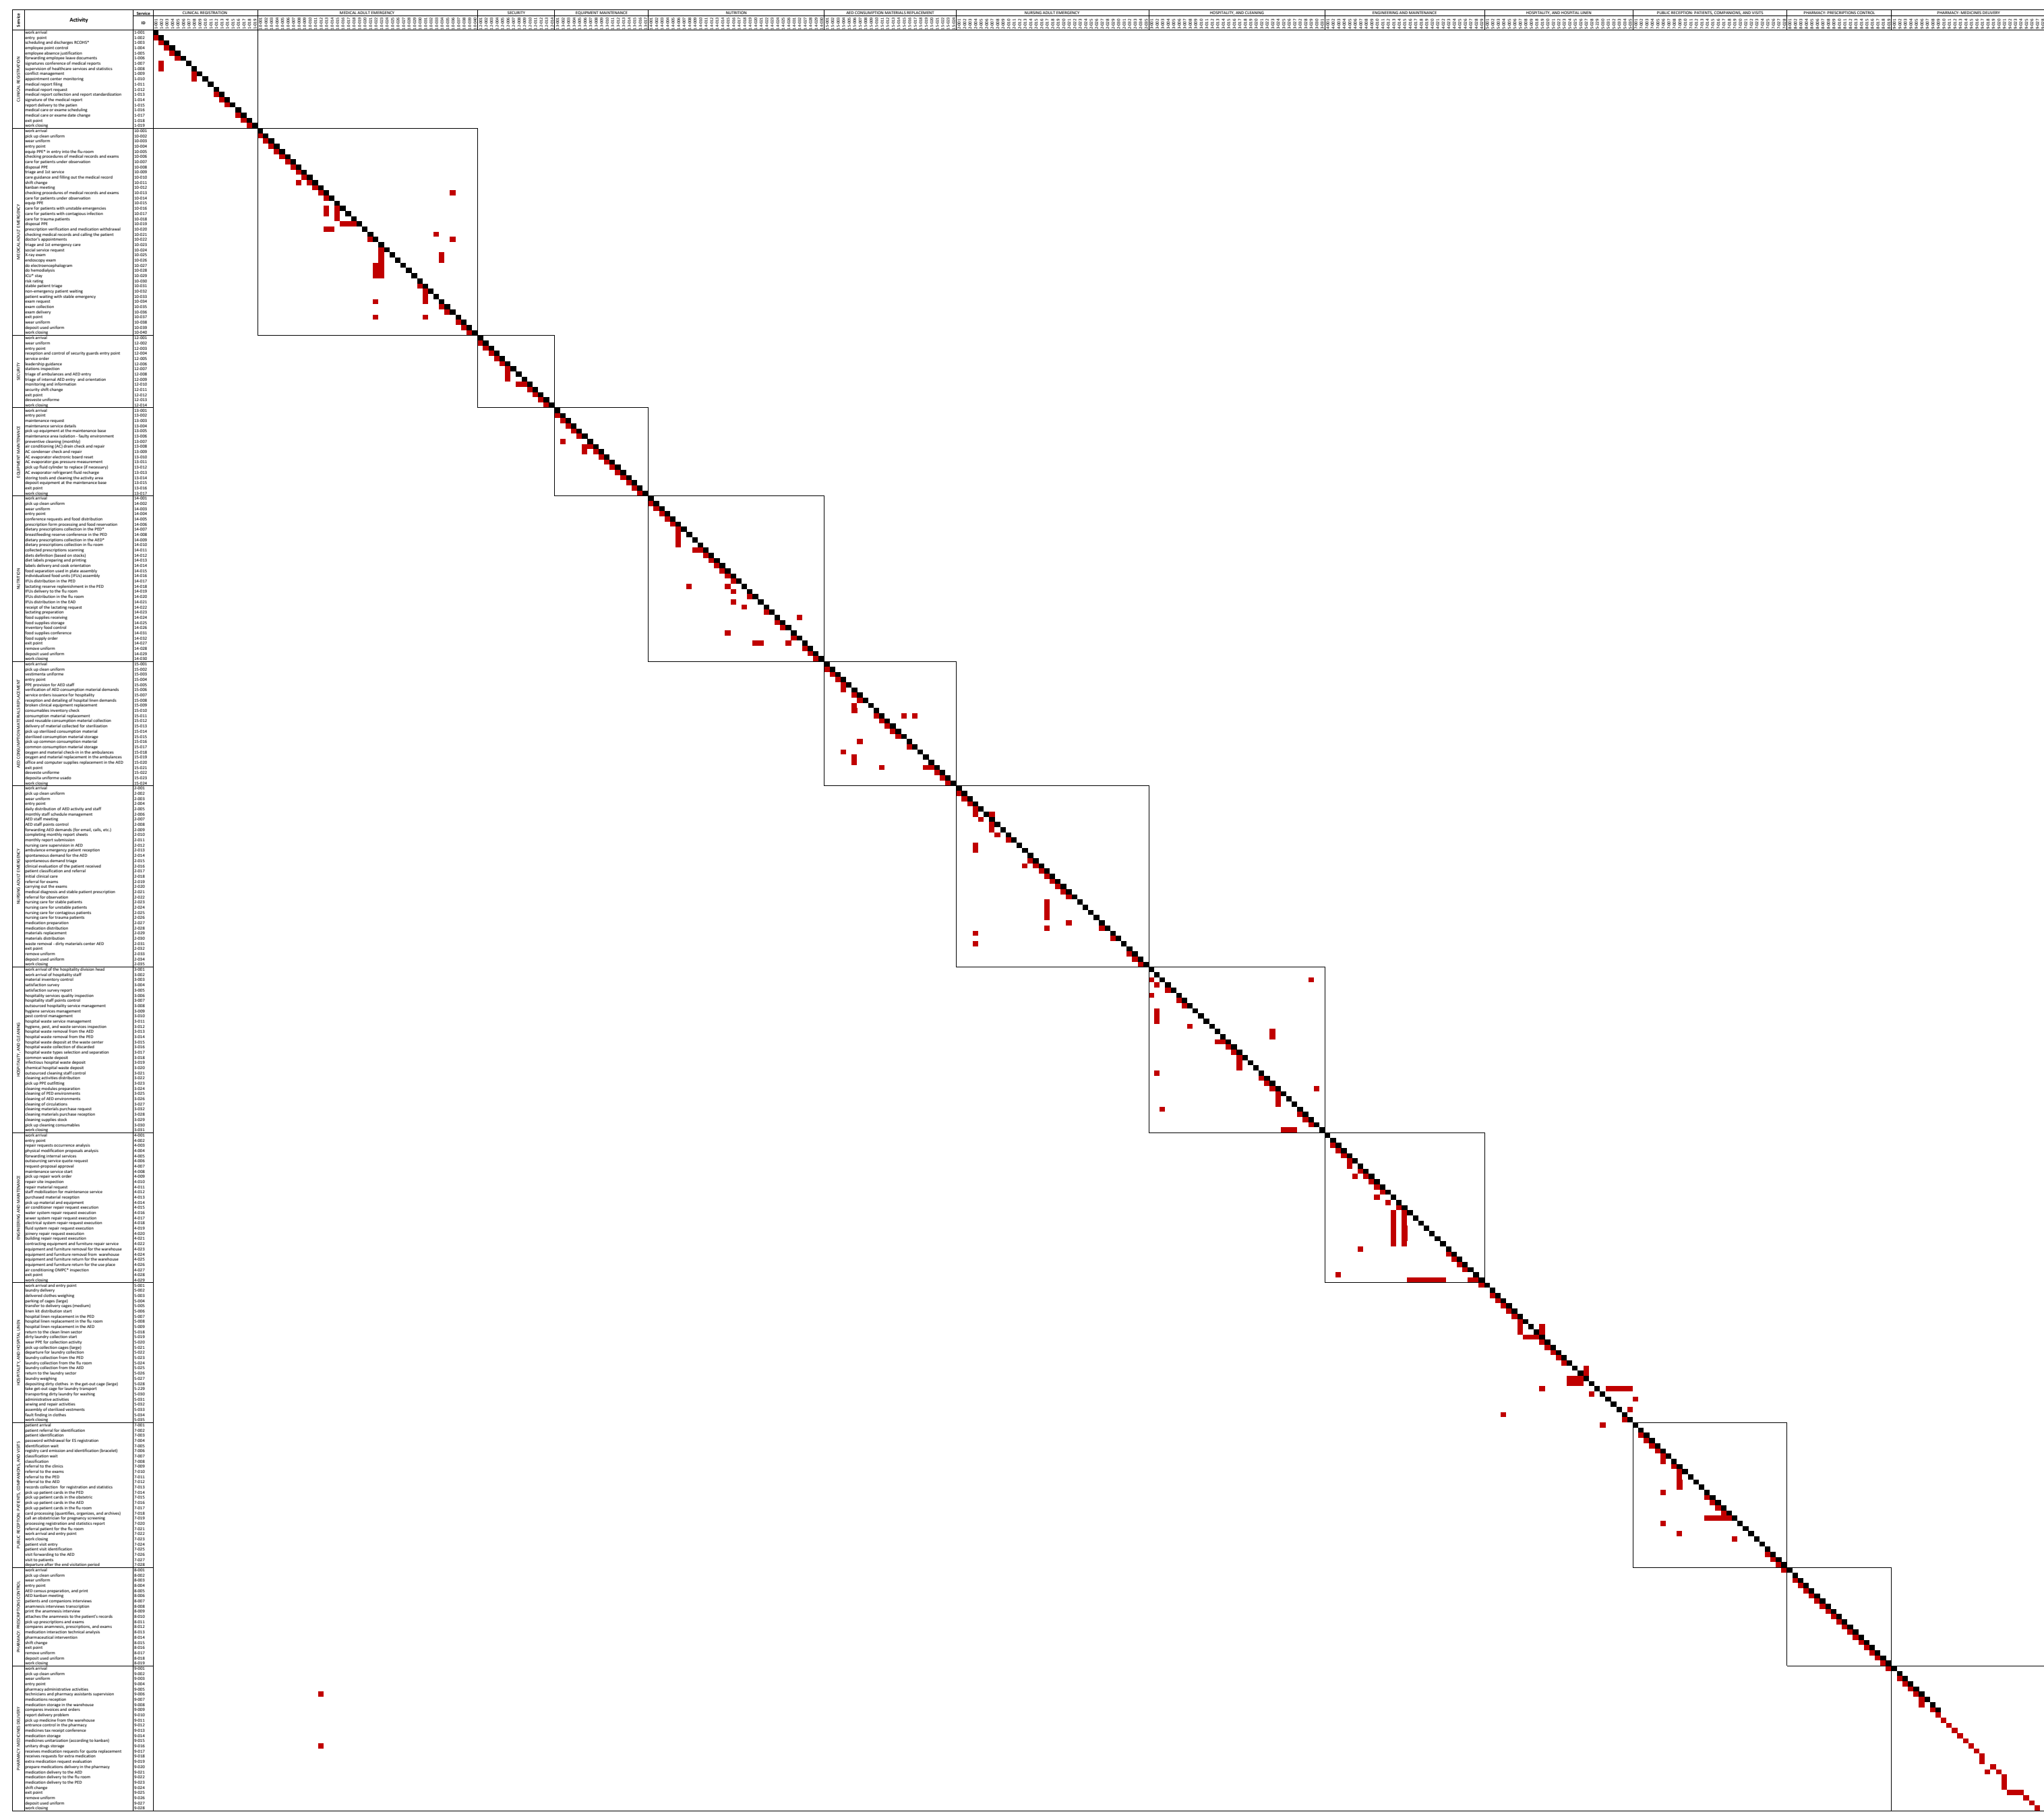

Supplement: s1 [file s1]

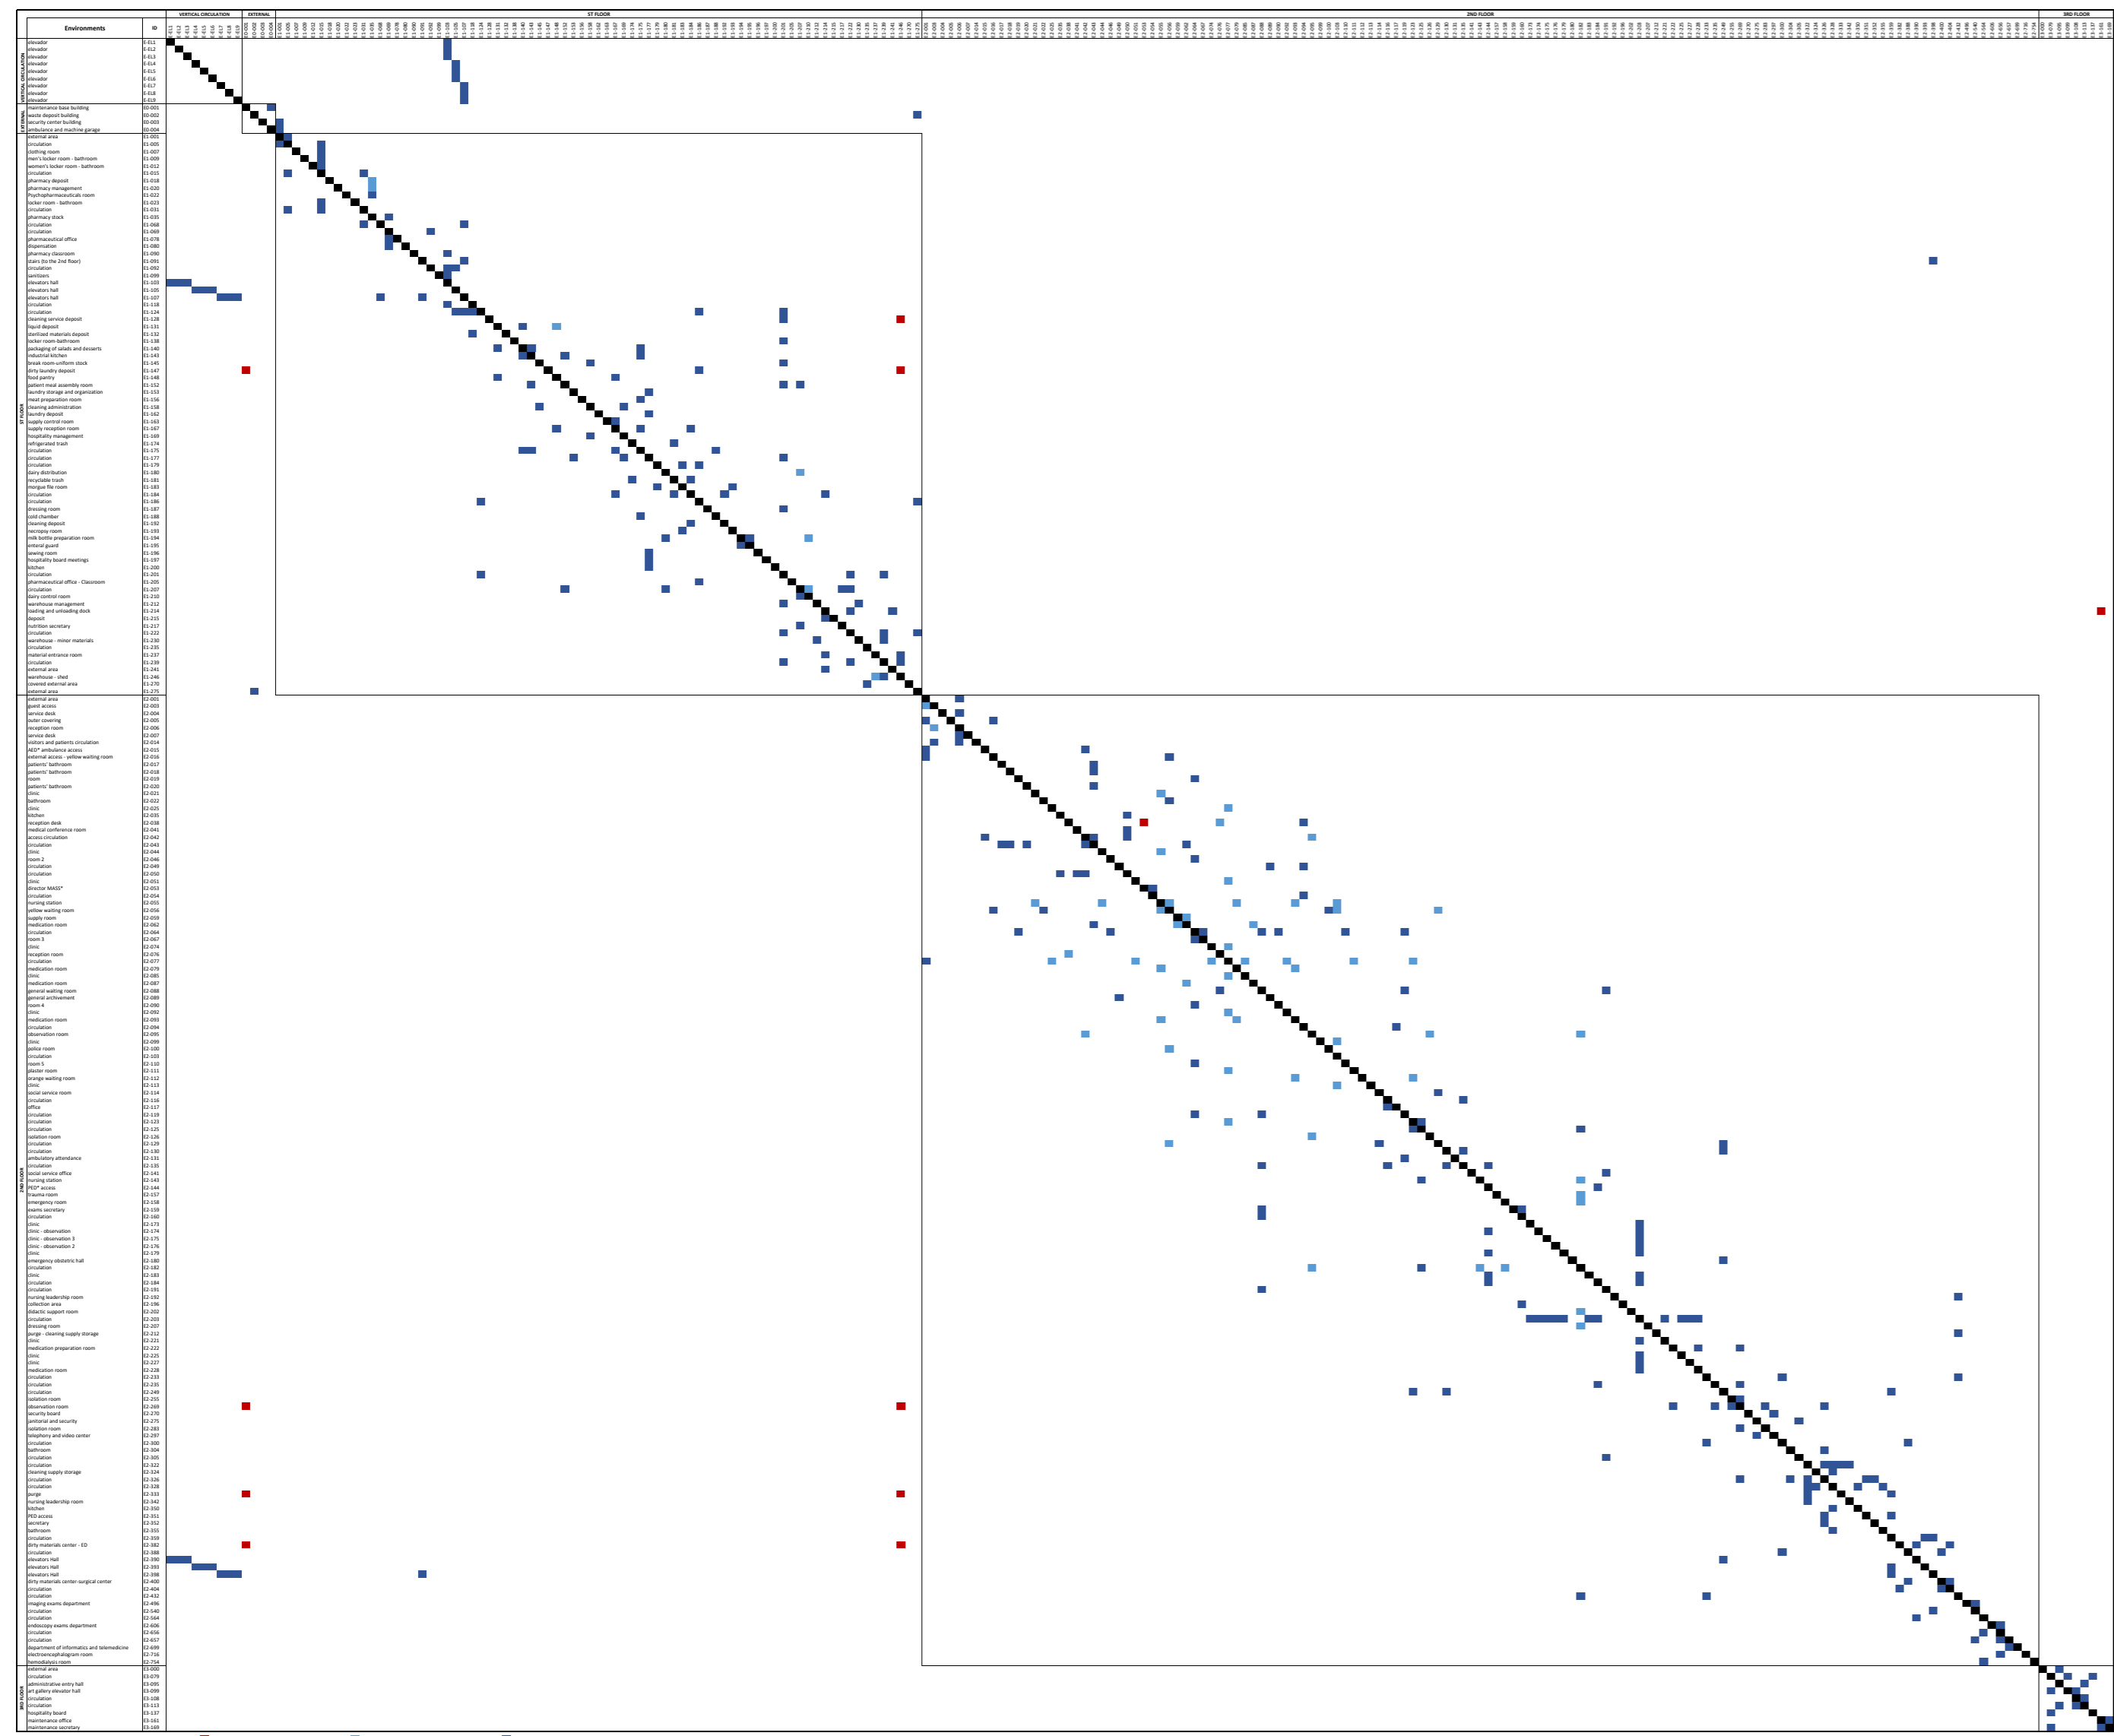

Supplement: s1 [file s1 › S09-environments_congruence_matrix.pdf]
